# Supplementary material for: Efficient syntheses of four stable-isotope labeled (1R)-menthyl (1S,2S)-(+)-2-phenylcyclopropanecarboxylates
Source: Royal Society of Chemistry journal article supplement (doi:10.1039/b605912k), 2006-01-01

## Supporting Information

### Efficient Syntheses of Four Stable-Isotope Labeled (1*R*)-Menthyl (1*S*,2*S*)-(+)-2-Phenylcyclopropanecarboxylates

Edmund J. Keliher, Richard C. Burrell, Harry R. Chobanian, Karina L. Conkrite, Rajesh Shukla, and John E. Baldwin  
*Department of Chemistry, Syracuse University, Syracuse, New York 13244-4100*

- S1: Title Page and Detailed List of the Contents of the Supporting Information
- S2: <sup>1</sup>H NMR spectrum of (1*S*,2*S*)-(-)-1,2-di(2,4,6-trimethylbenzylideneamino)-1,2-diphenylethane (**4**)
- S3: <sup>1</sup>H NMR spectrum of (1*S*,2*S*)-(-)-1,2-di(2,4,6-trimethylbenzylamino)-1,2-diphenylethane (**5**)
- S4: <sup>1</sup>H NMR spectrum of (1*R*)-menthyl diazoacetate
- S5: <sup>1</sup>H NMR spectrum of (1*R*)-menthyl  $\alpha$ -deuteriodiazoacetate
- S6: <sup>1</sup>H NMR spectrum of styrene- $\beta$ -<sup>13</sup>C (**6**- $\beta$ -<sup>13</sup>C)
- S7: <sup>13</sup>C NMR spectrum of styrene- $\beta$ -<sup>13</sup>C (**6**- $\beta$ -<sup>13</sup>C)
- S8: <sup>1</sup>H NMR spectrum of *trans*- $\beta$ -triphenylstannylstyrene
- S9: <sup>1</sup>H NMR spectrum of (*E*)- $\beta$ -deuteriostyrene (**6**- $\beta$ -(*E*)-*d*)
- S10: <sup>1</sup>H NMR spectrum of 1,1-*d*<sub>2</sub>-2-phenylethanol
- S11: <sup>1</sup>H NMR spectrum of 1,1-*d*<sub>2</sub>-2-phenylethyl bromide
- S12: <sup>1</sup>H NMR spectrum of  $\beta$ ,  $\beta$ -dideuteriostyrene (**6**- $\beta$ , $\beta$ -*d*<sub>2</sub>)
- S13: <sup>1</sup>H NMR spectrum of (*E*)- $\alpha$ -deuterio- $\beta$ -triphenylstannylstyrene
- S14: <sup>1</sup>H NMR spectrum of (*E*)- $\alpha$ , $\beta$ -dideuteriostyrene (**6**- $\alpha$ , $\beta$ -(*E*)-*d*<sub>2</sub>)
- S15: <sup>1</sup>H NMR spectrum of methyl (1*S*,2*S*)-(+)-2-phenylcyclopropanecarboxylate
- S16: <sup>13</sup>C NMR spectrum of methyl (1*S*,2*S*)-(+)-2-phenylcyclopropanecarboxylate
- S17: <sup>1</sup>H NMR spectrum of methyl (1*S*,2*S*)-(+)-1-*d*-3-<sup>13</sup>C-2-phenylcyclopropanecarboxylate (**7**-1-*d*-3-<sup>13</sup>C)
- S18: <sup>1</sup>H NMR spectrum of methyl (1*S*,2*S*)-(+)-1,(3*R*)-*d*<sub>2</sub>-2-phenylcyclopropanecarboxylate (**7**-1,(3*S*)-*d*<sub>2</sub>)
- S19: <sup>1</sup>H NMR spectrum of methyl (1*S*,2*S*)-(+)-1,3,3-*d*<sub>3</sub>-2-phenylcyclopropanecarboxylate (**7**-1,3,3-*d*<sub>3</sub>)
- S20: <sup>1</sup>H NMR spectrum of methyl (1*S*,2*S*)-(+)-1,2,(3*S*)-*d*<sub>3</sub>-2-phenylcyclopropanecarboxylate (**7**-1,2,(3*S*)-*d*<sub>3</sub>)

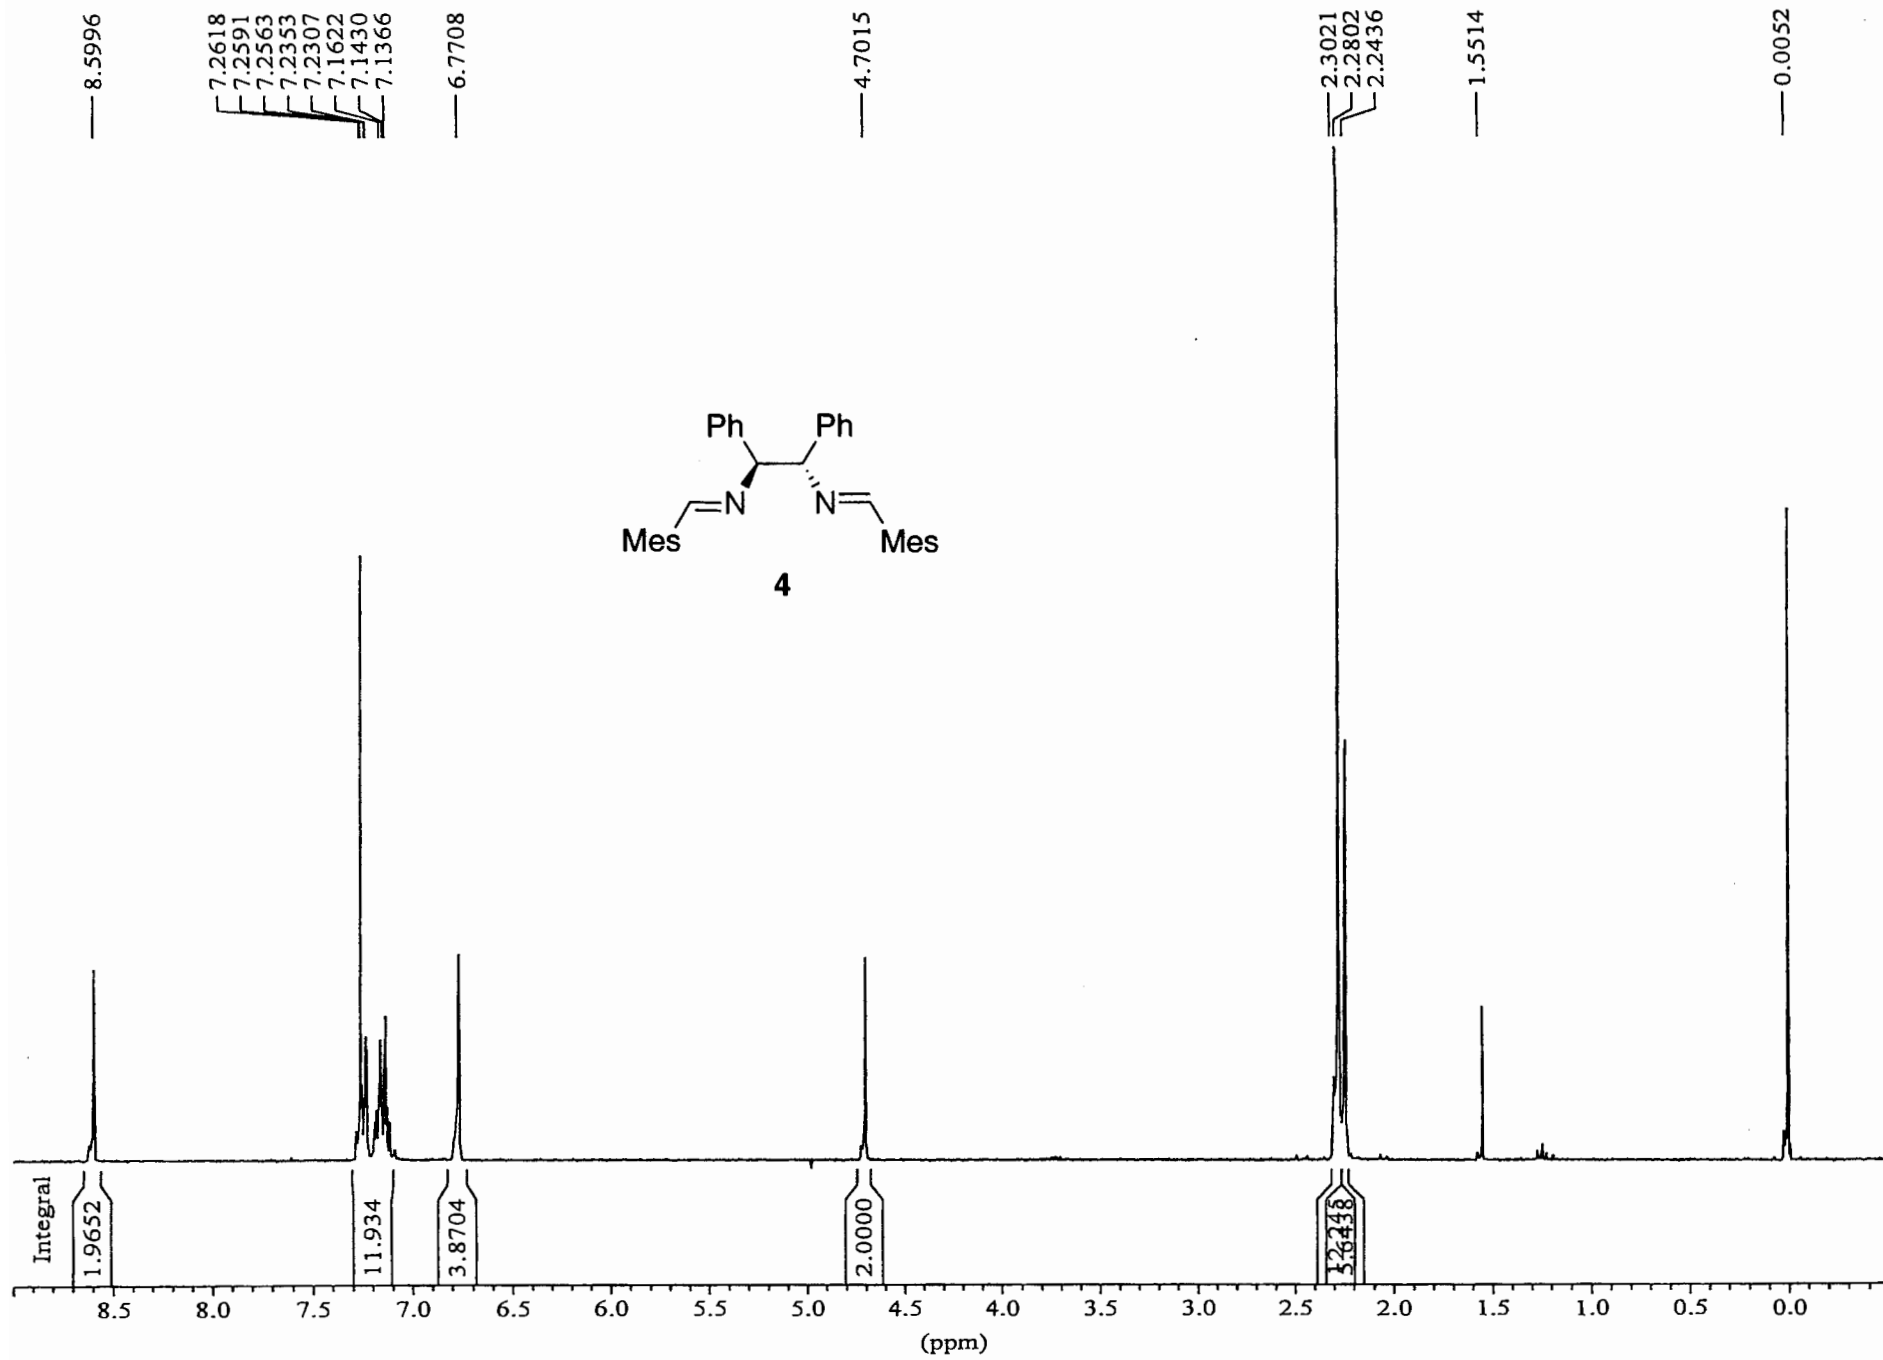

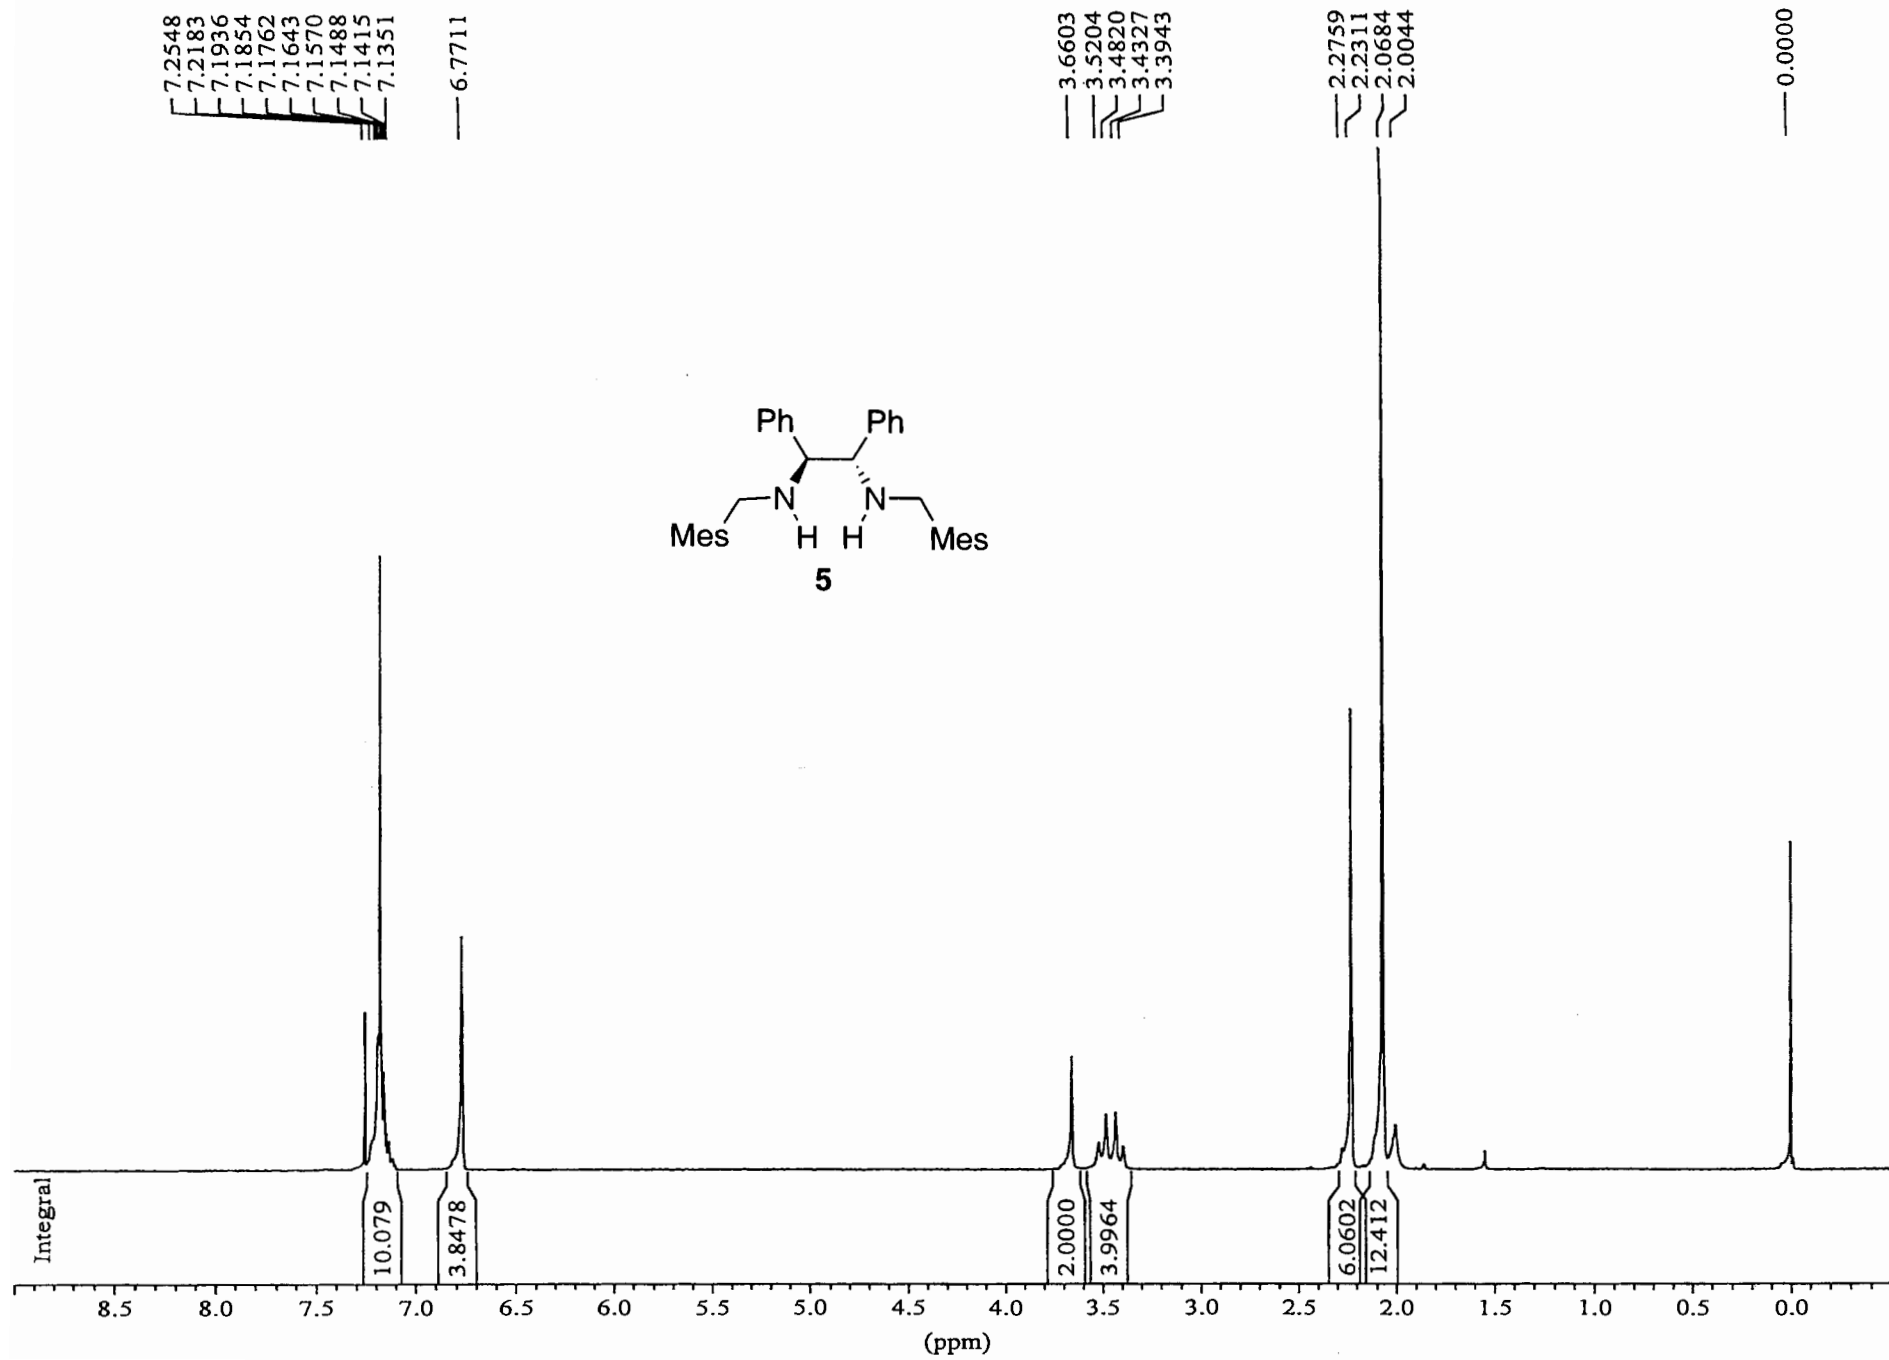

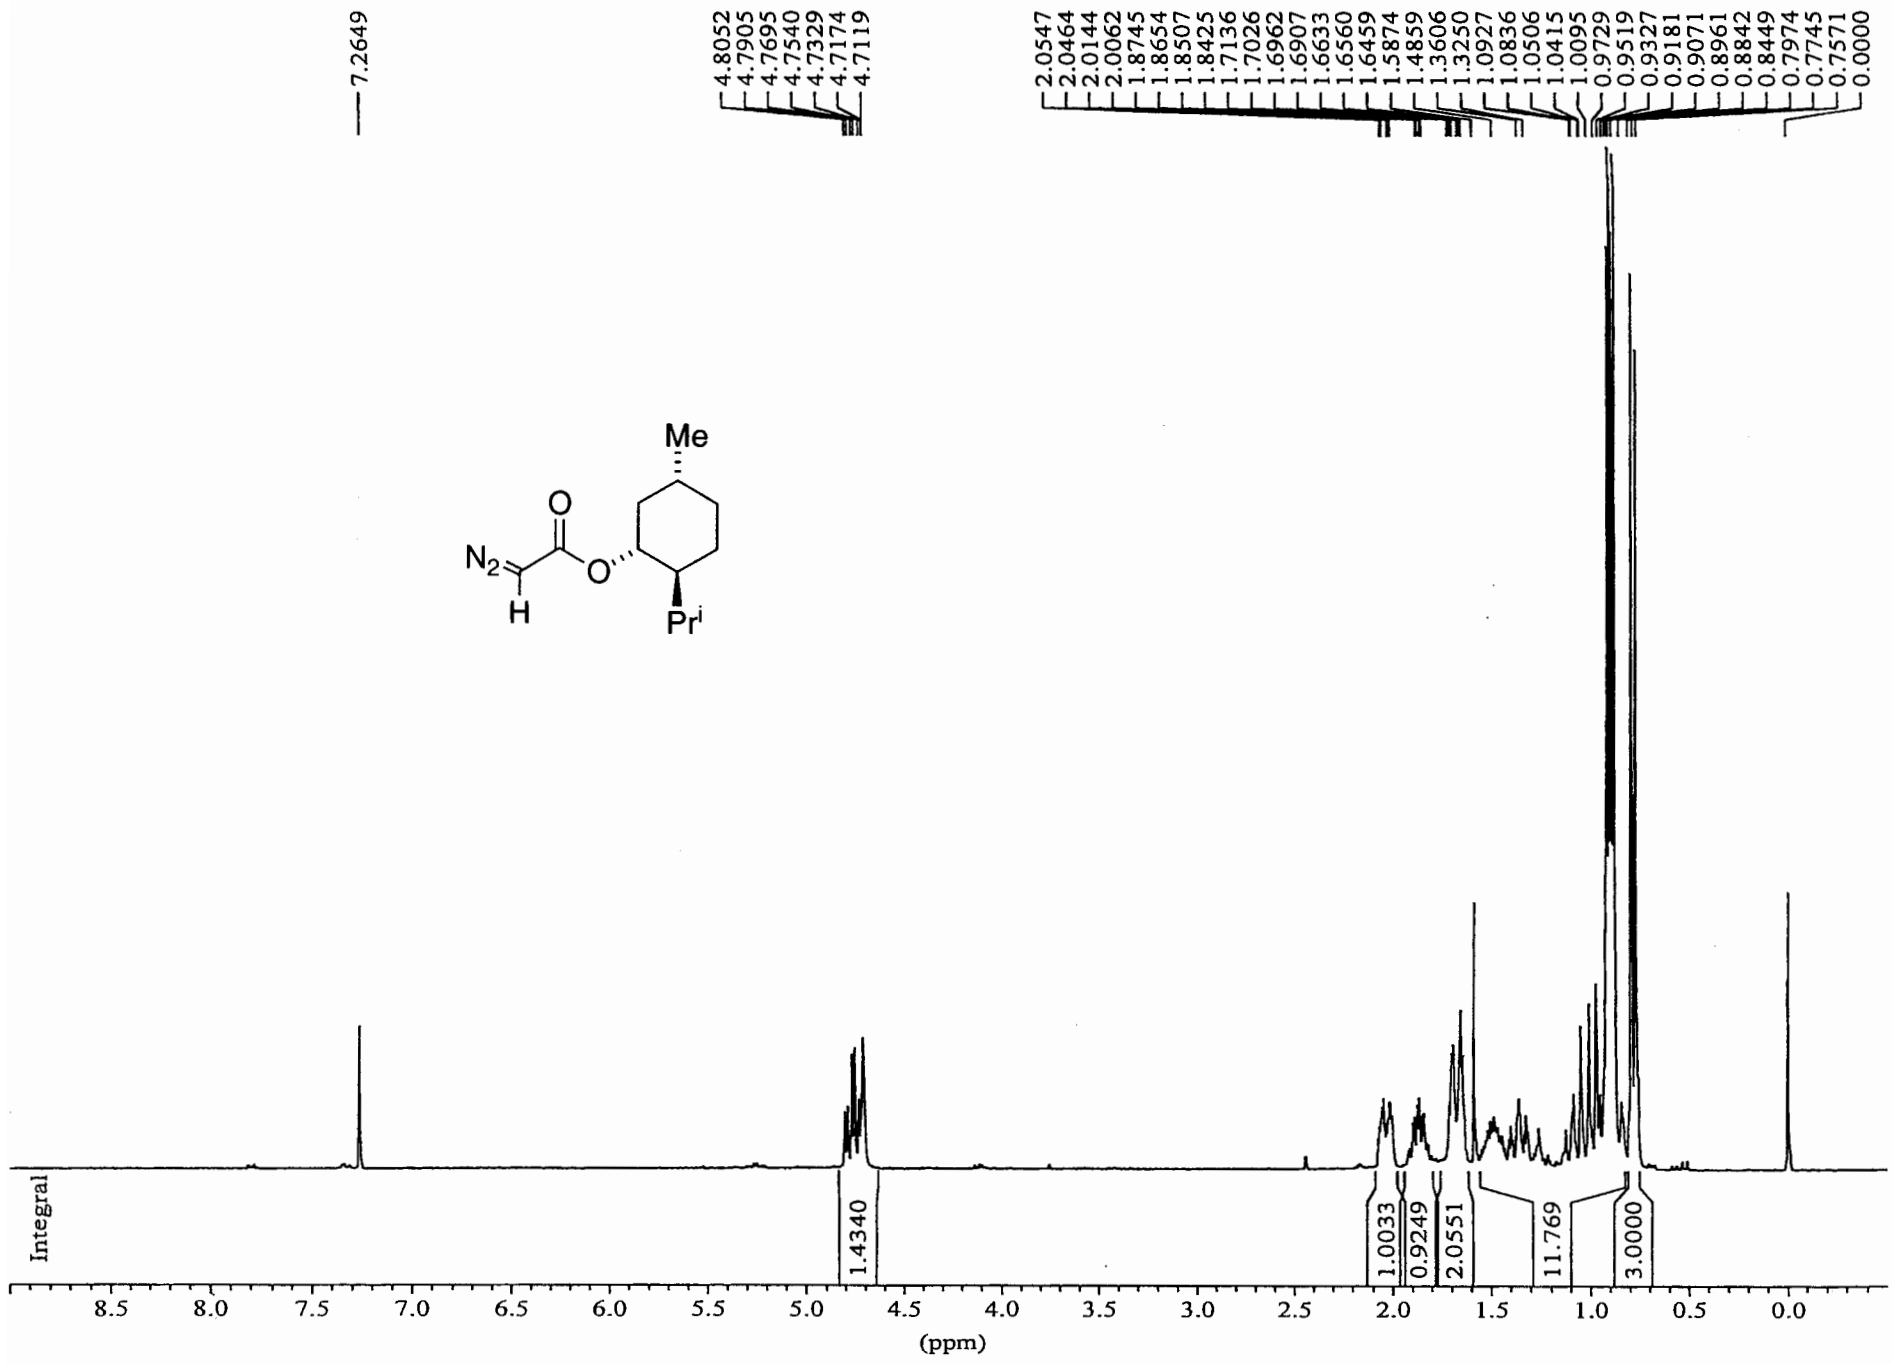

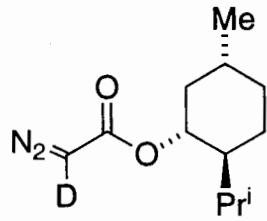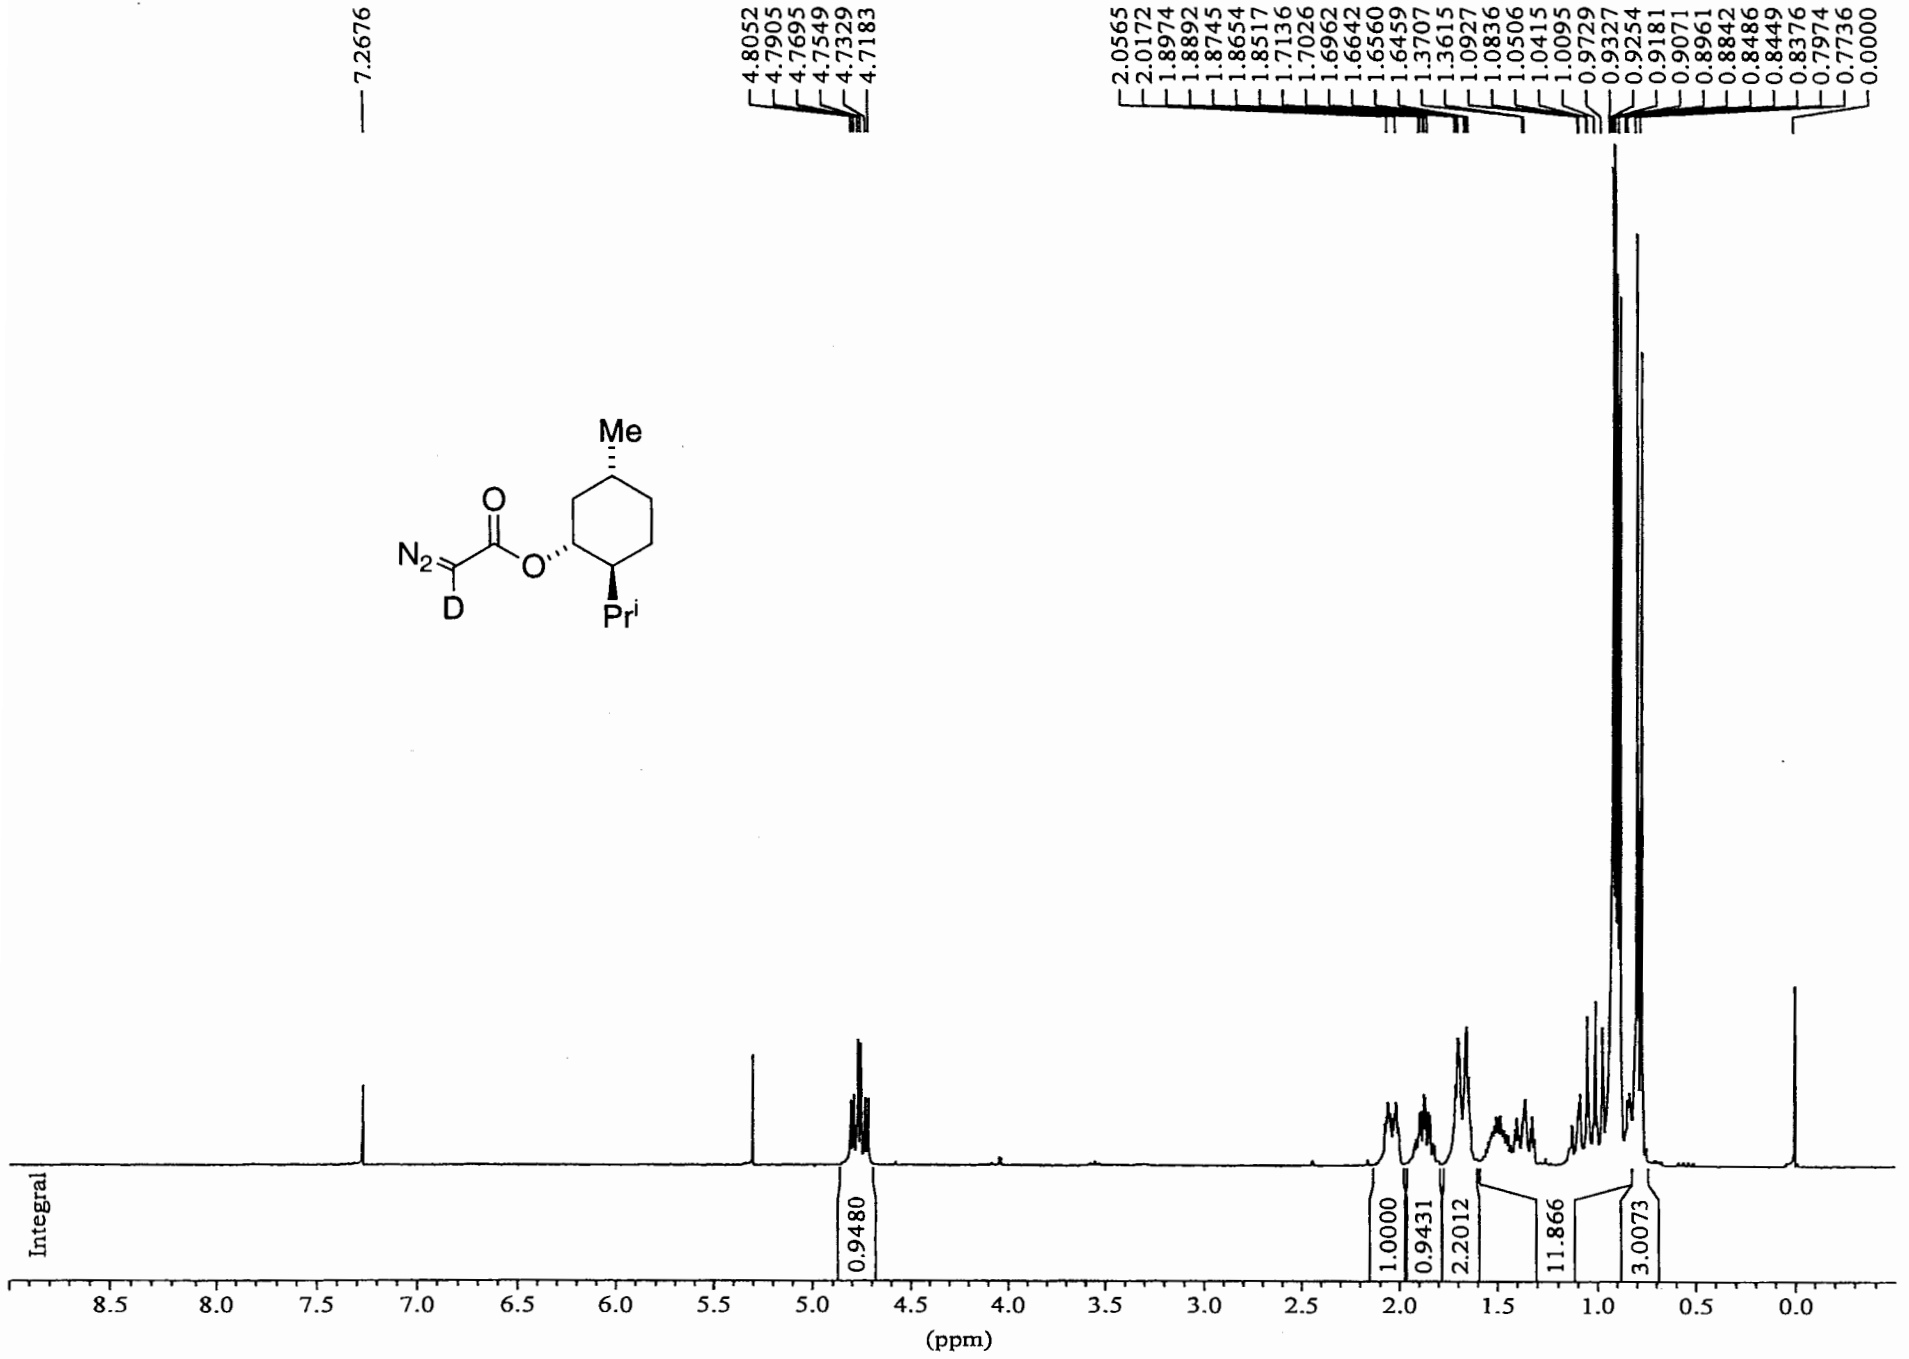

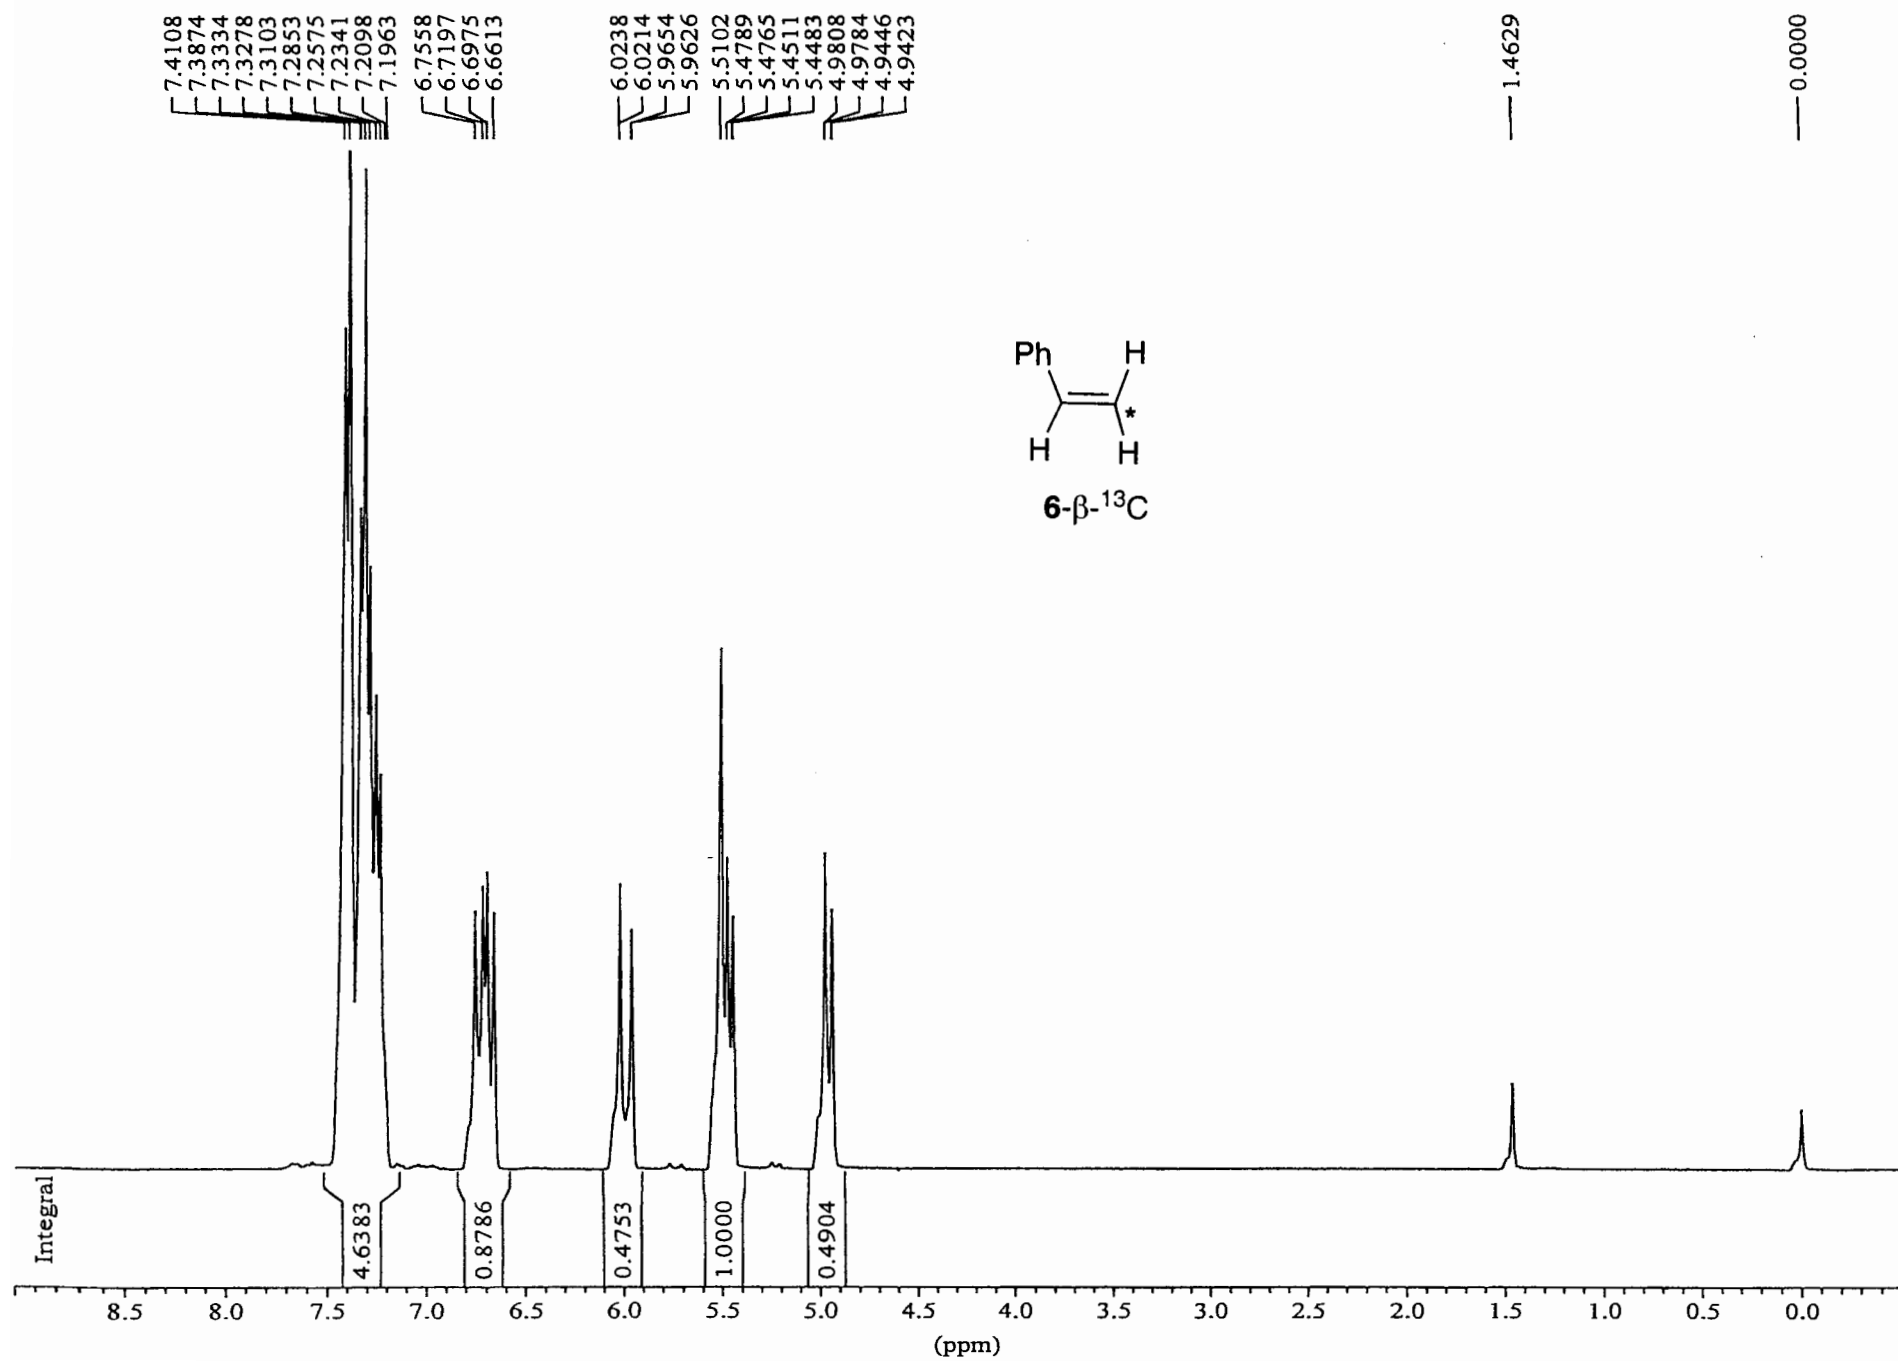

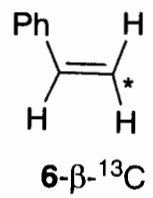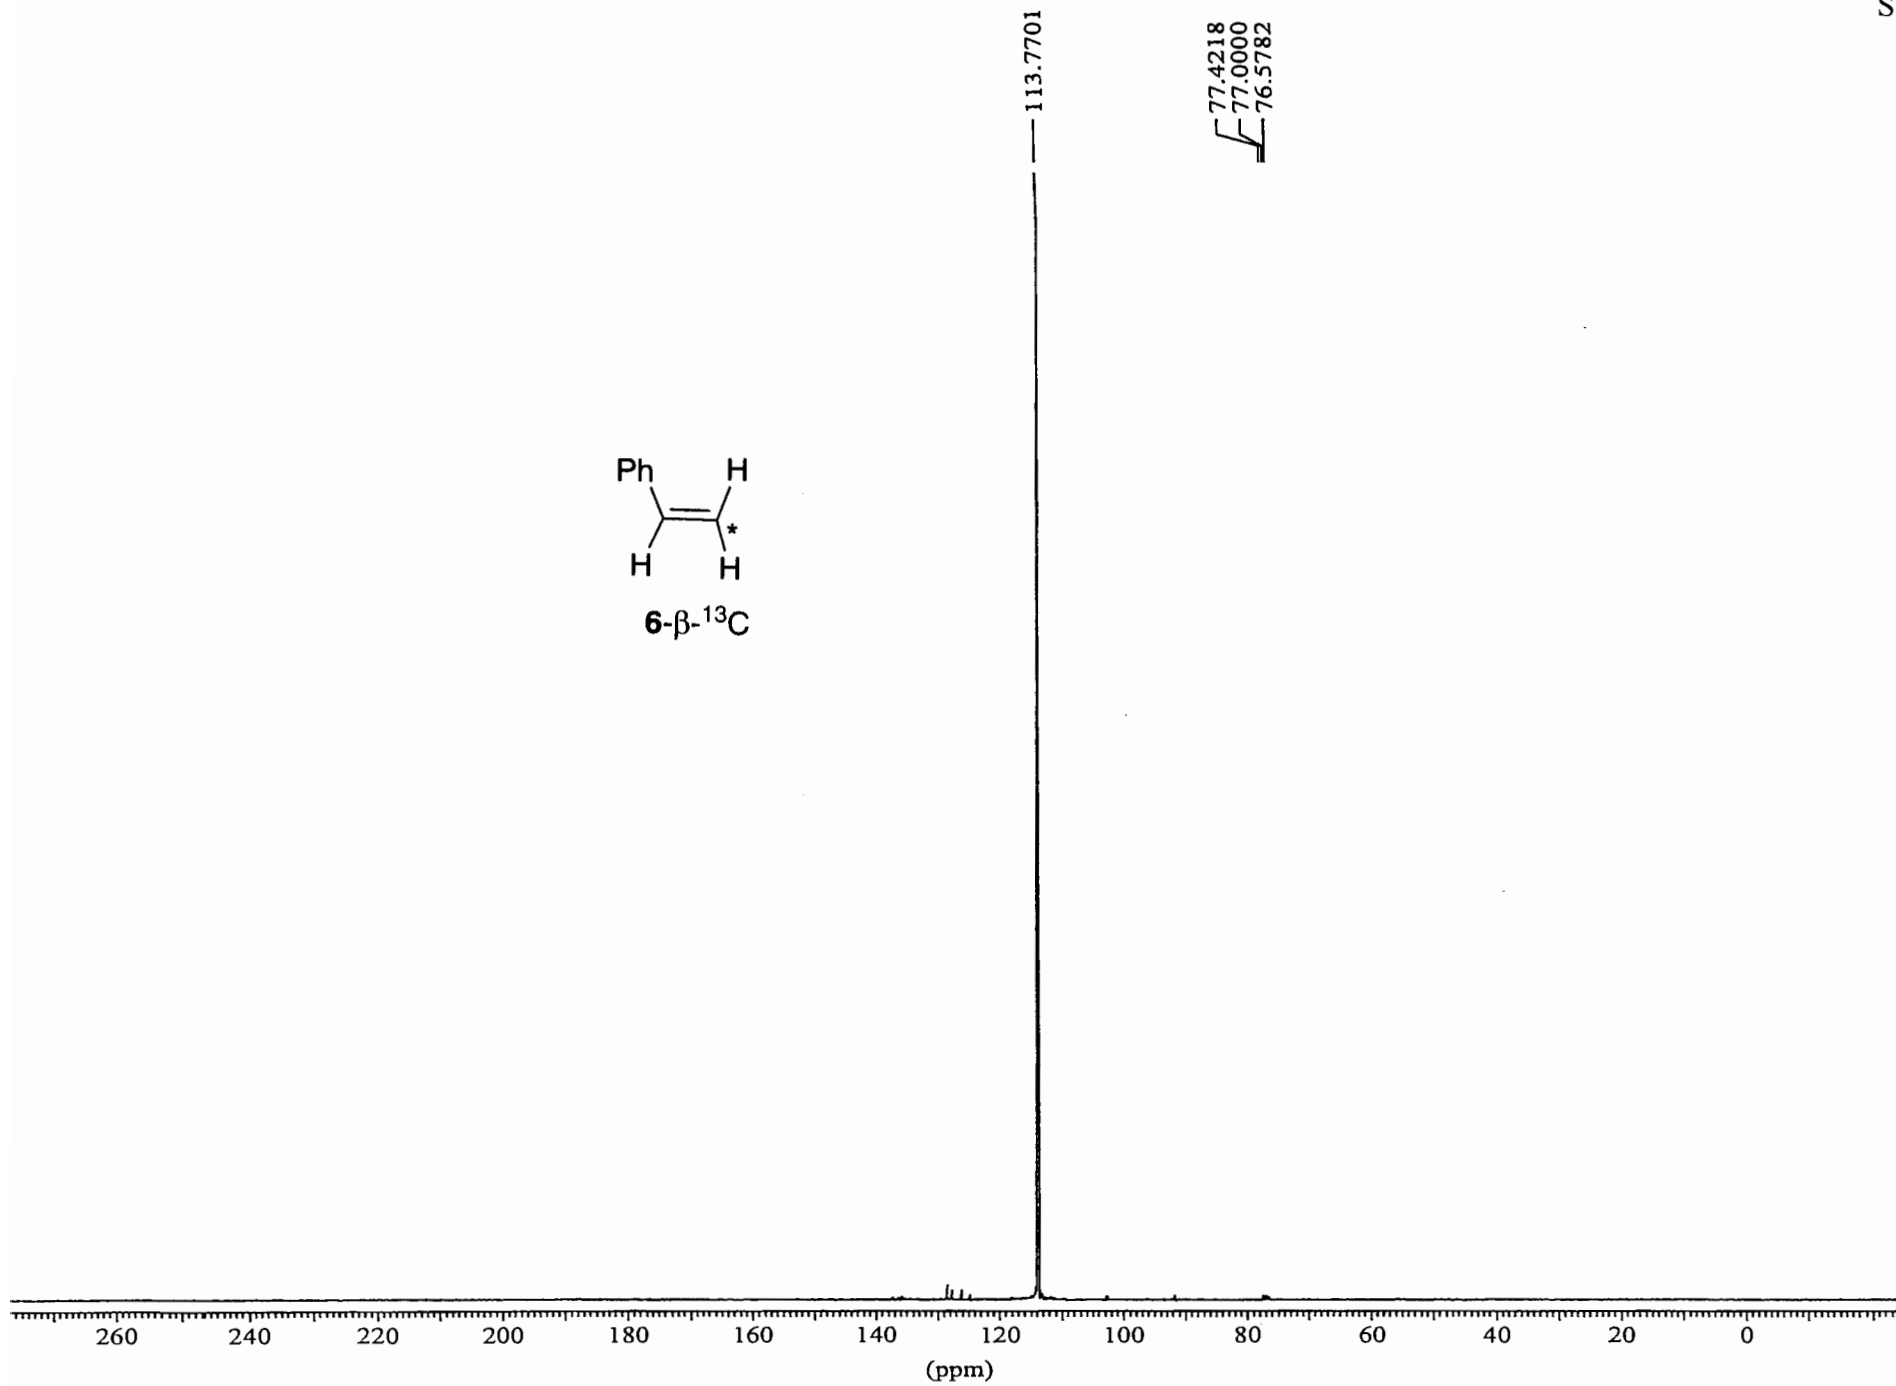

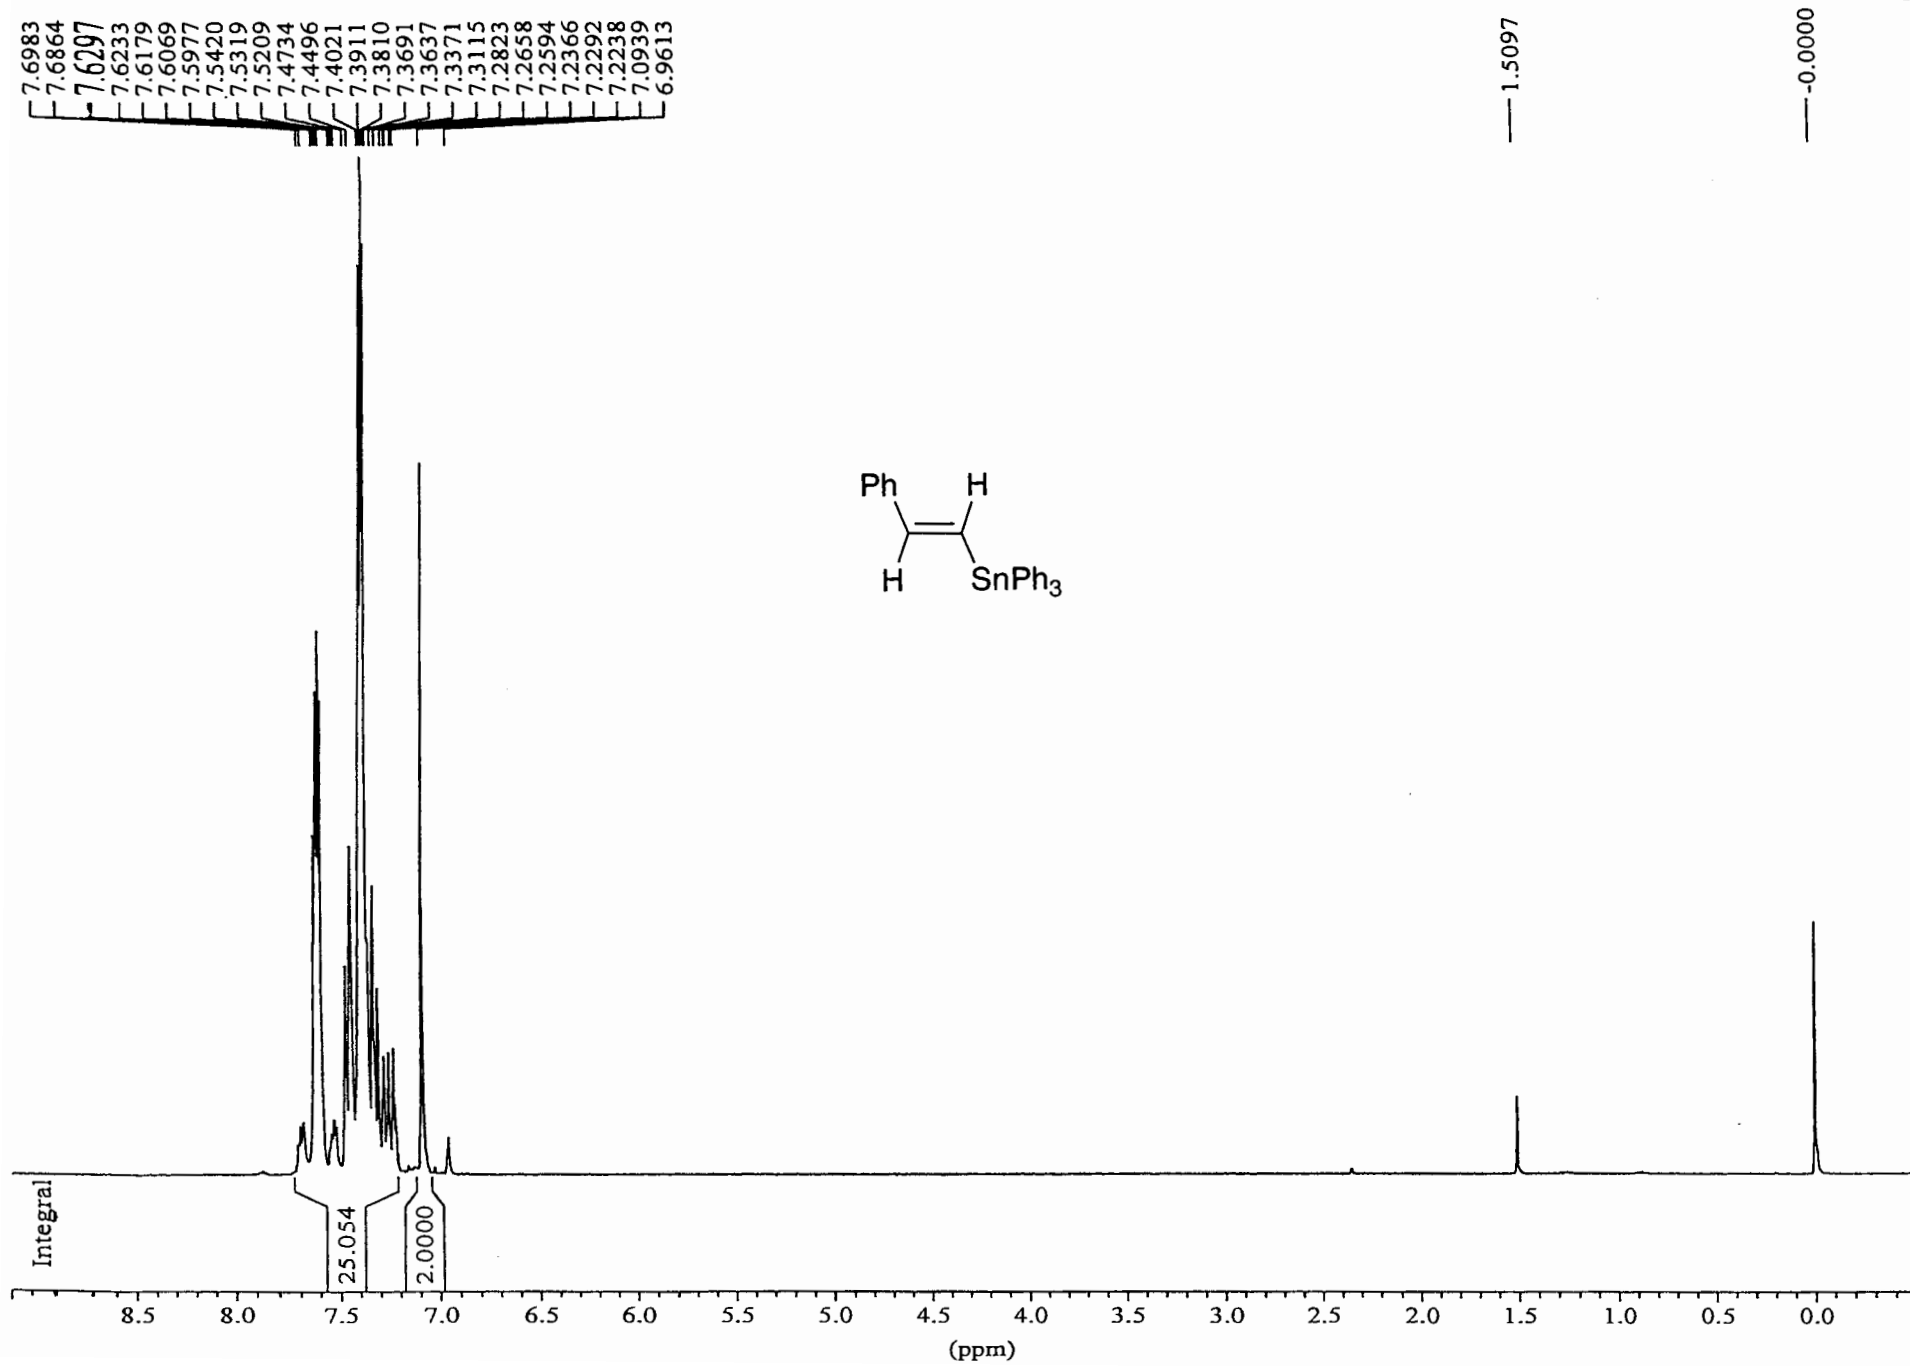



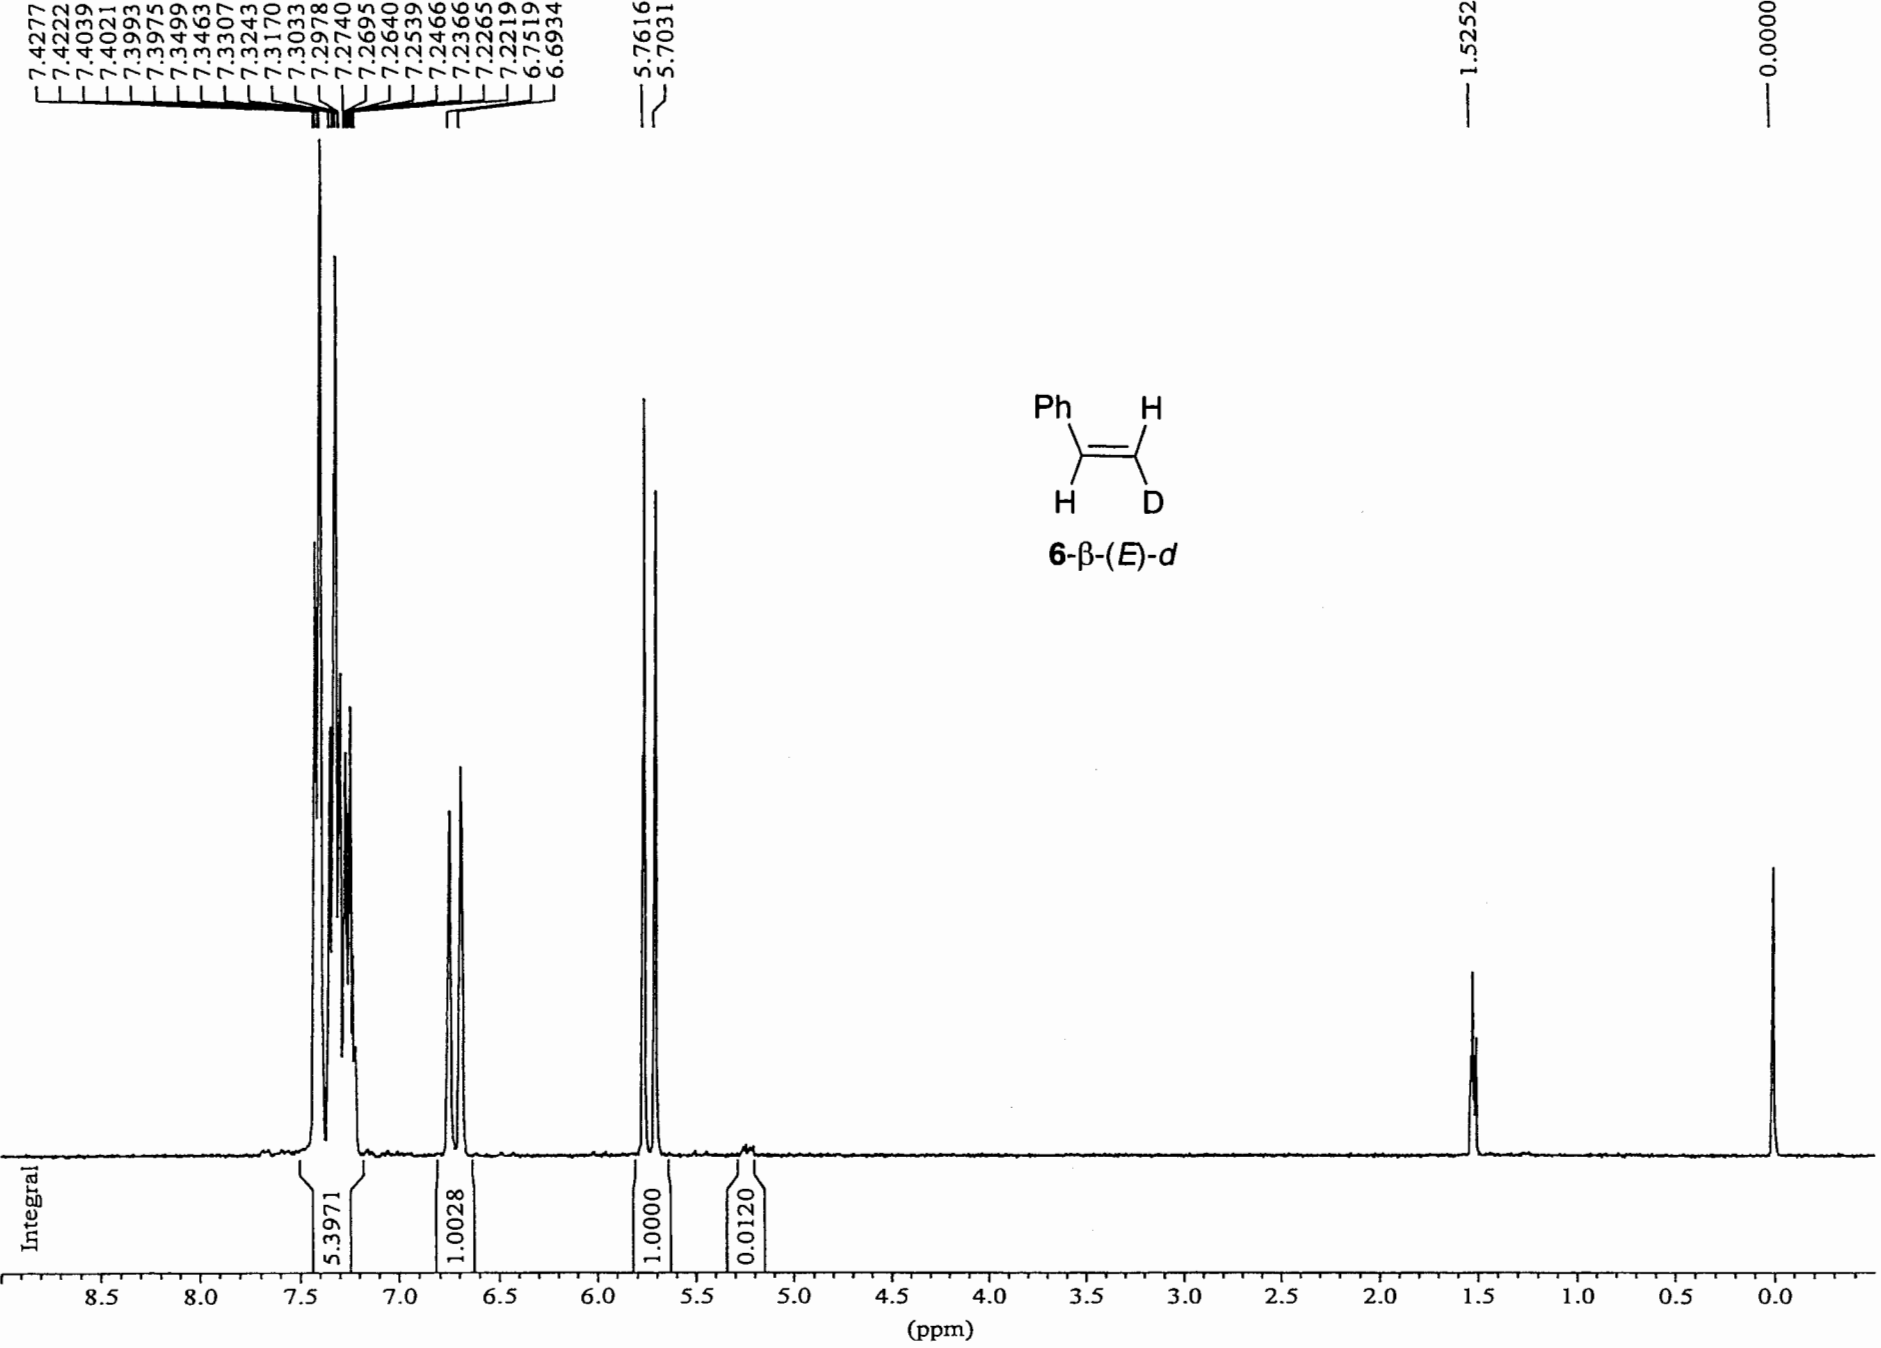

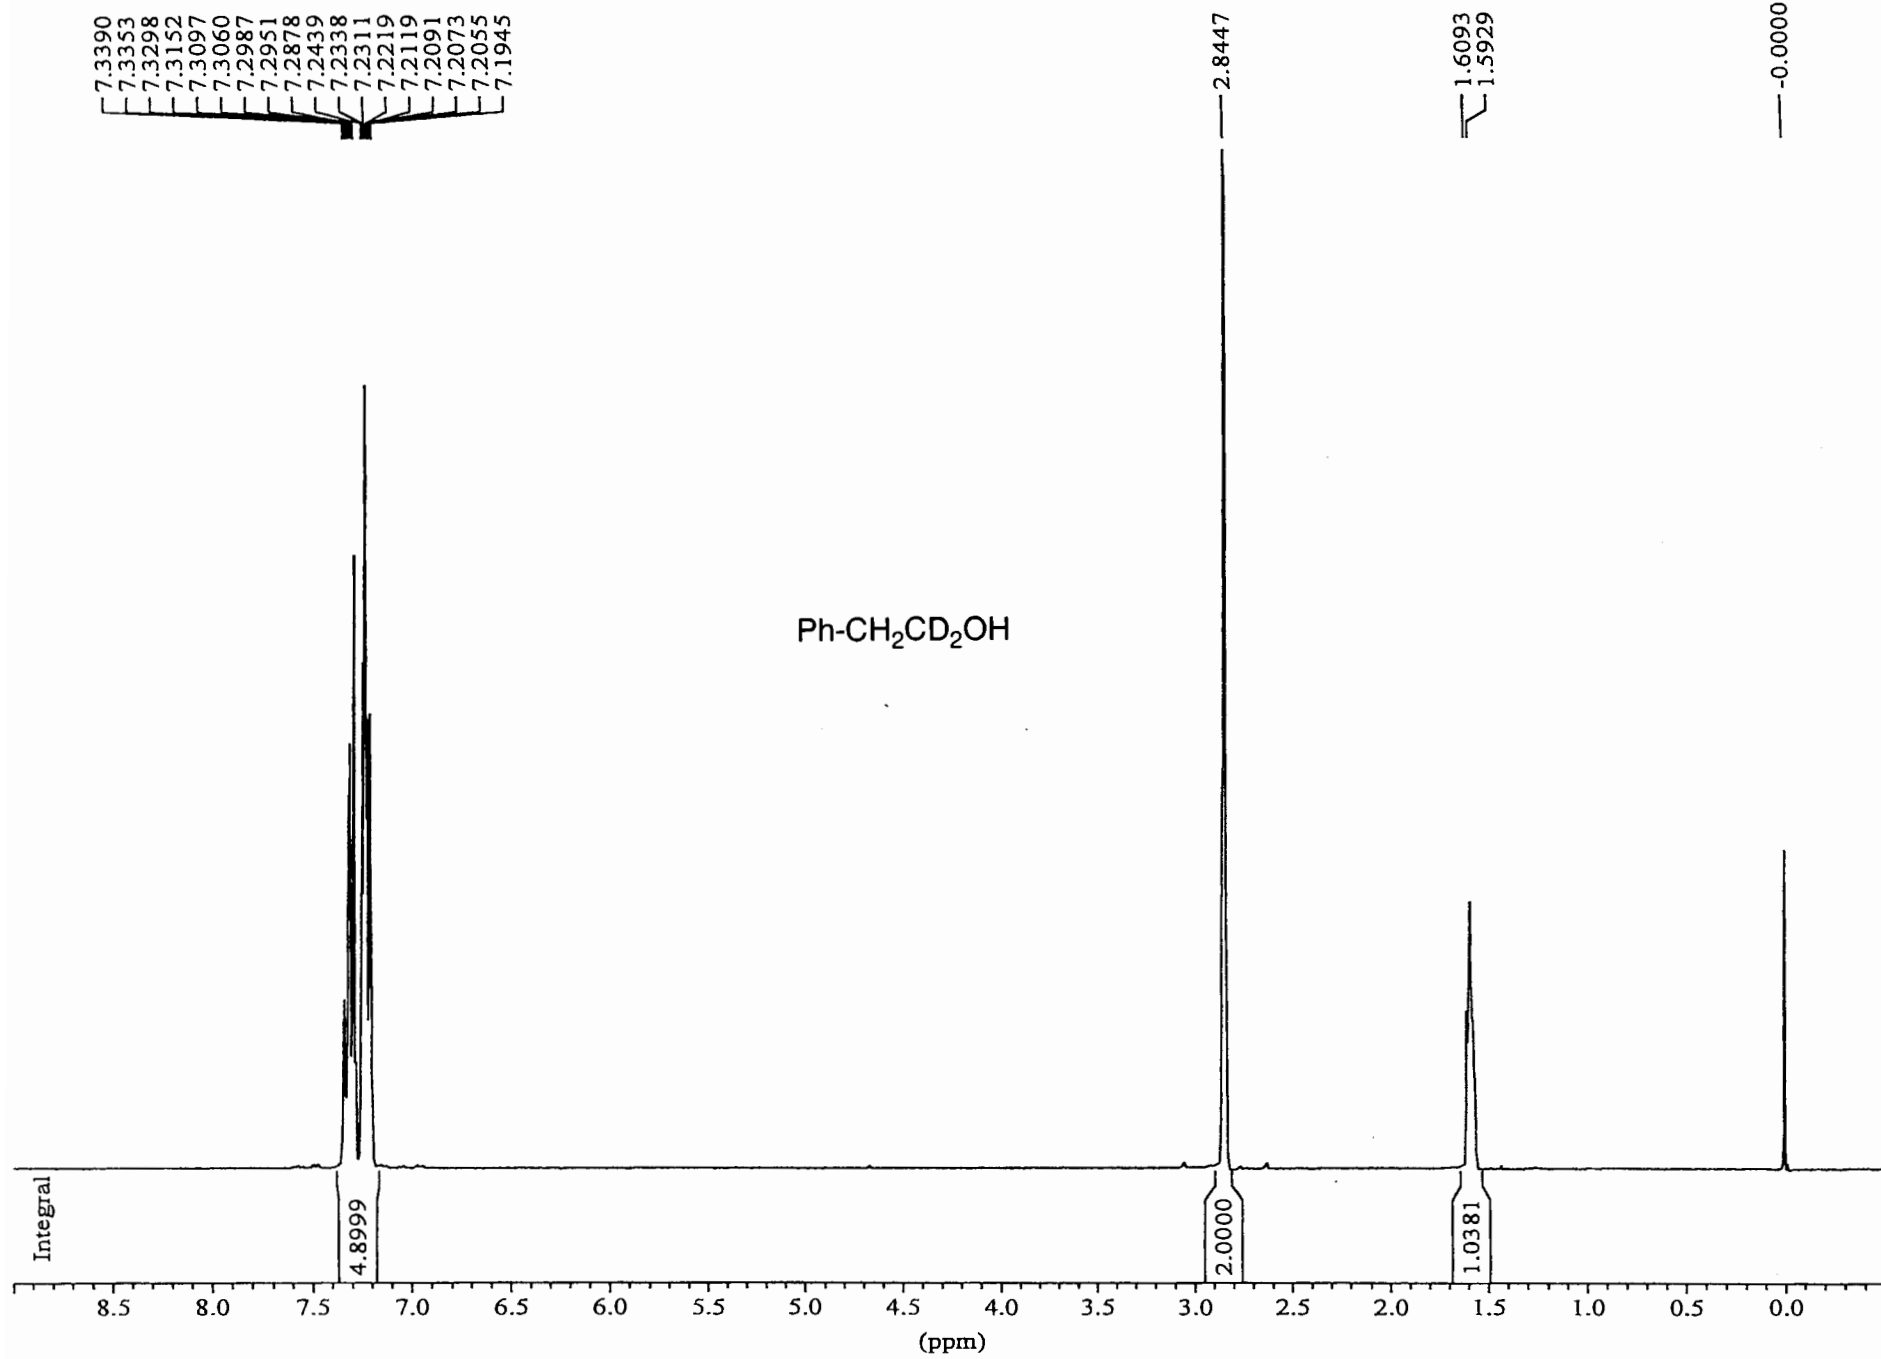

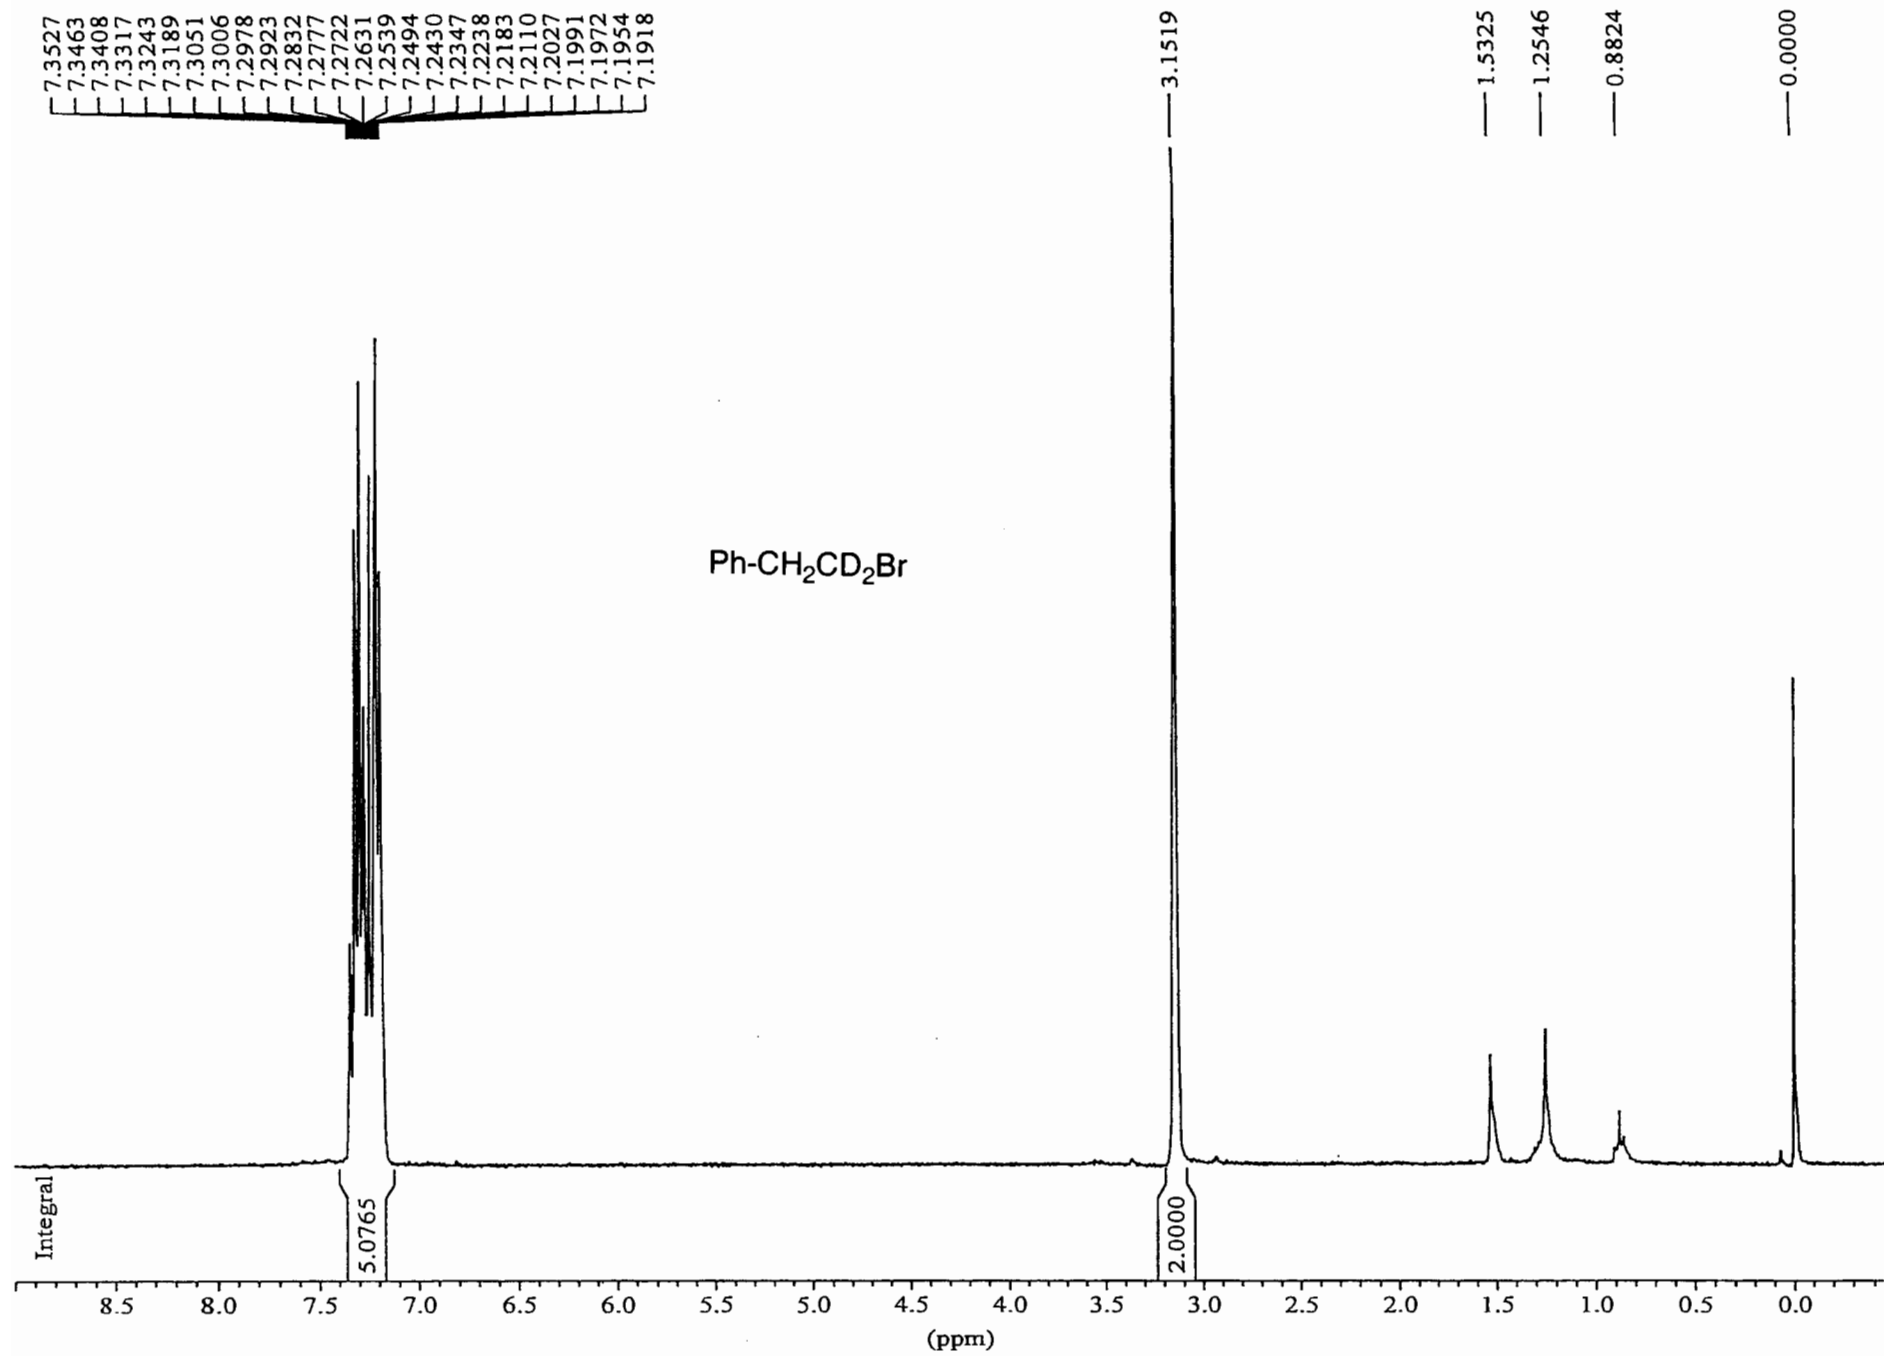

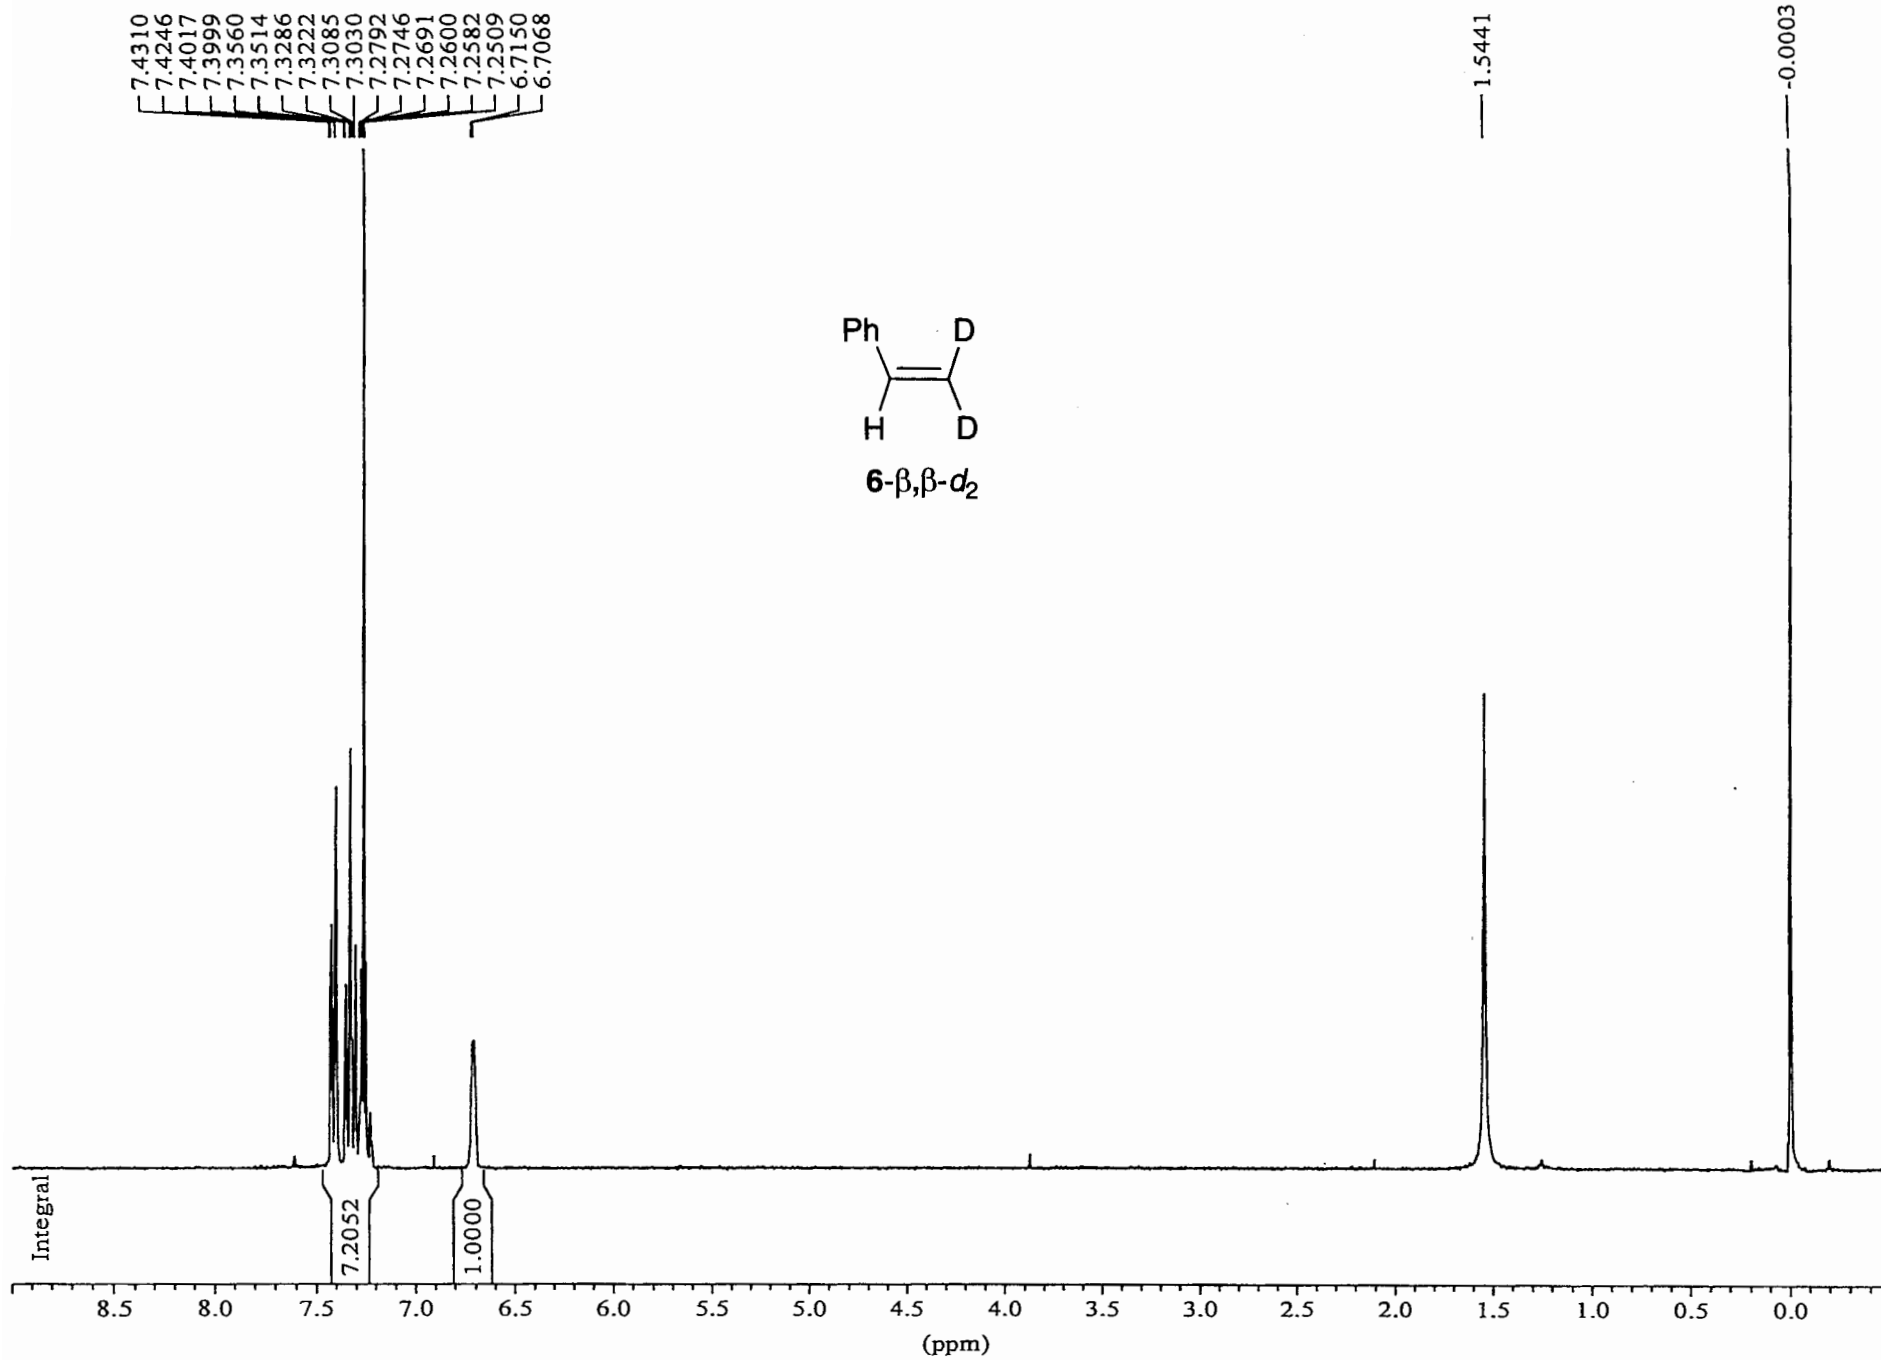

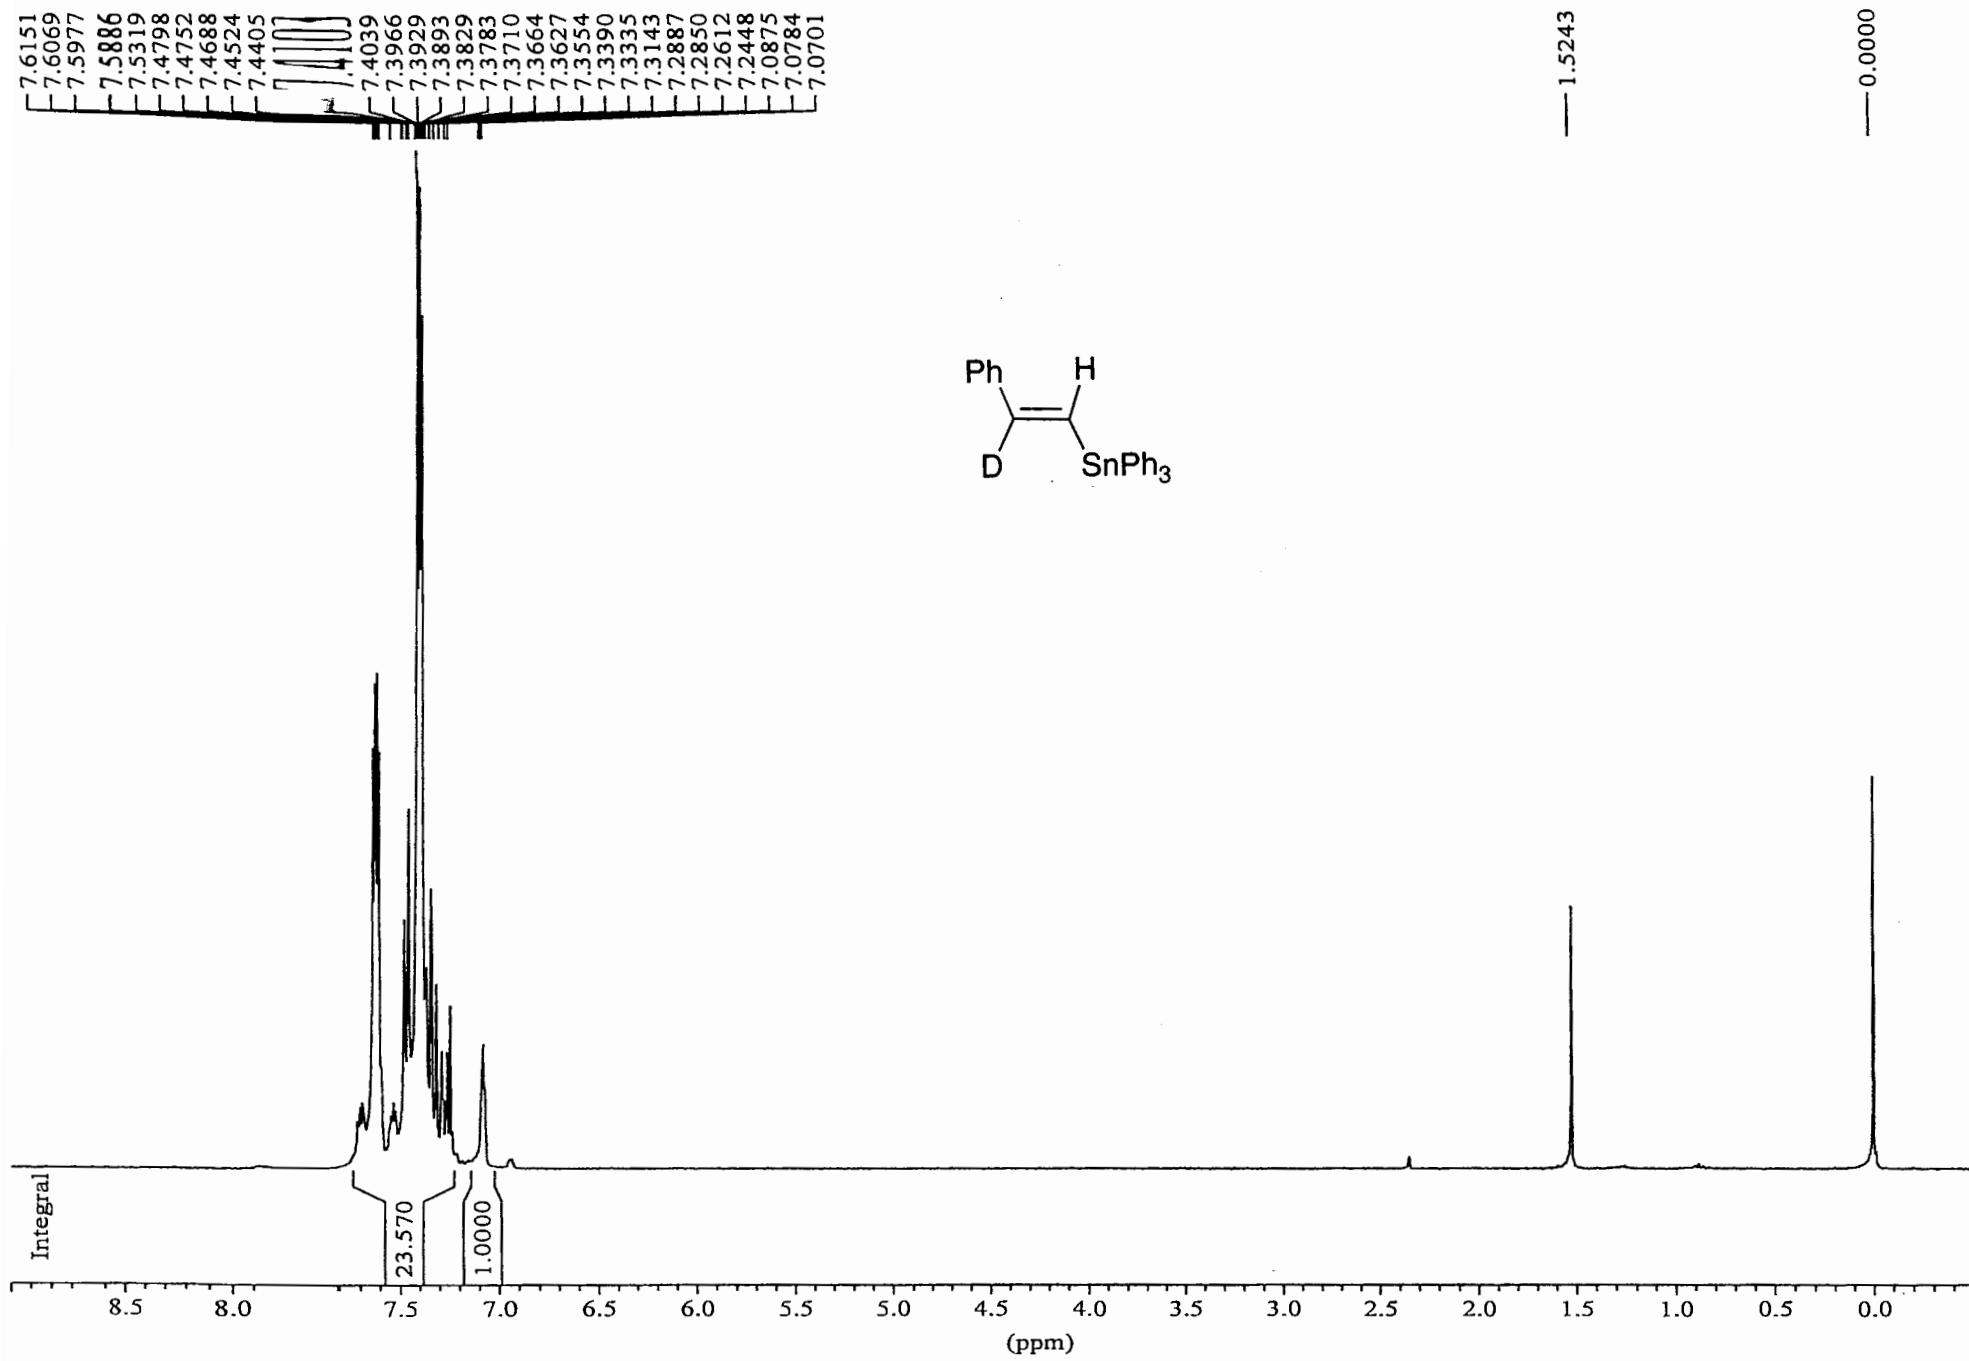

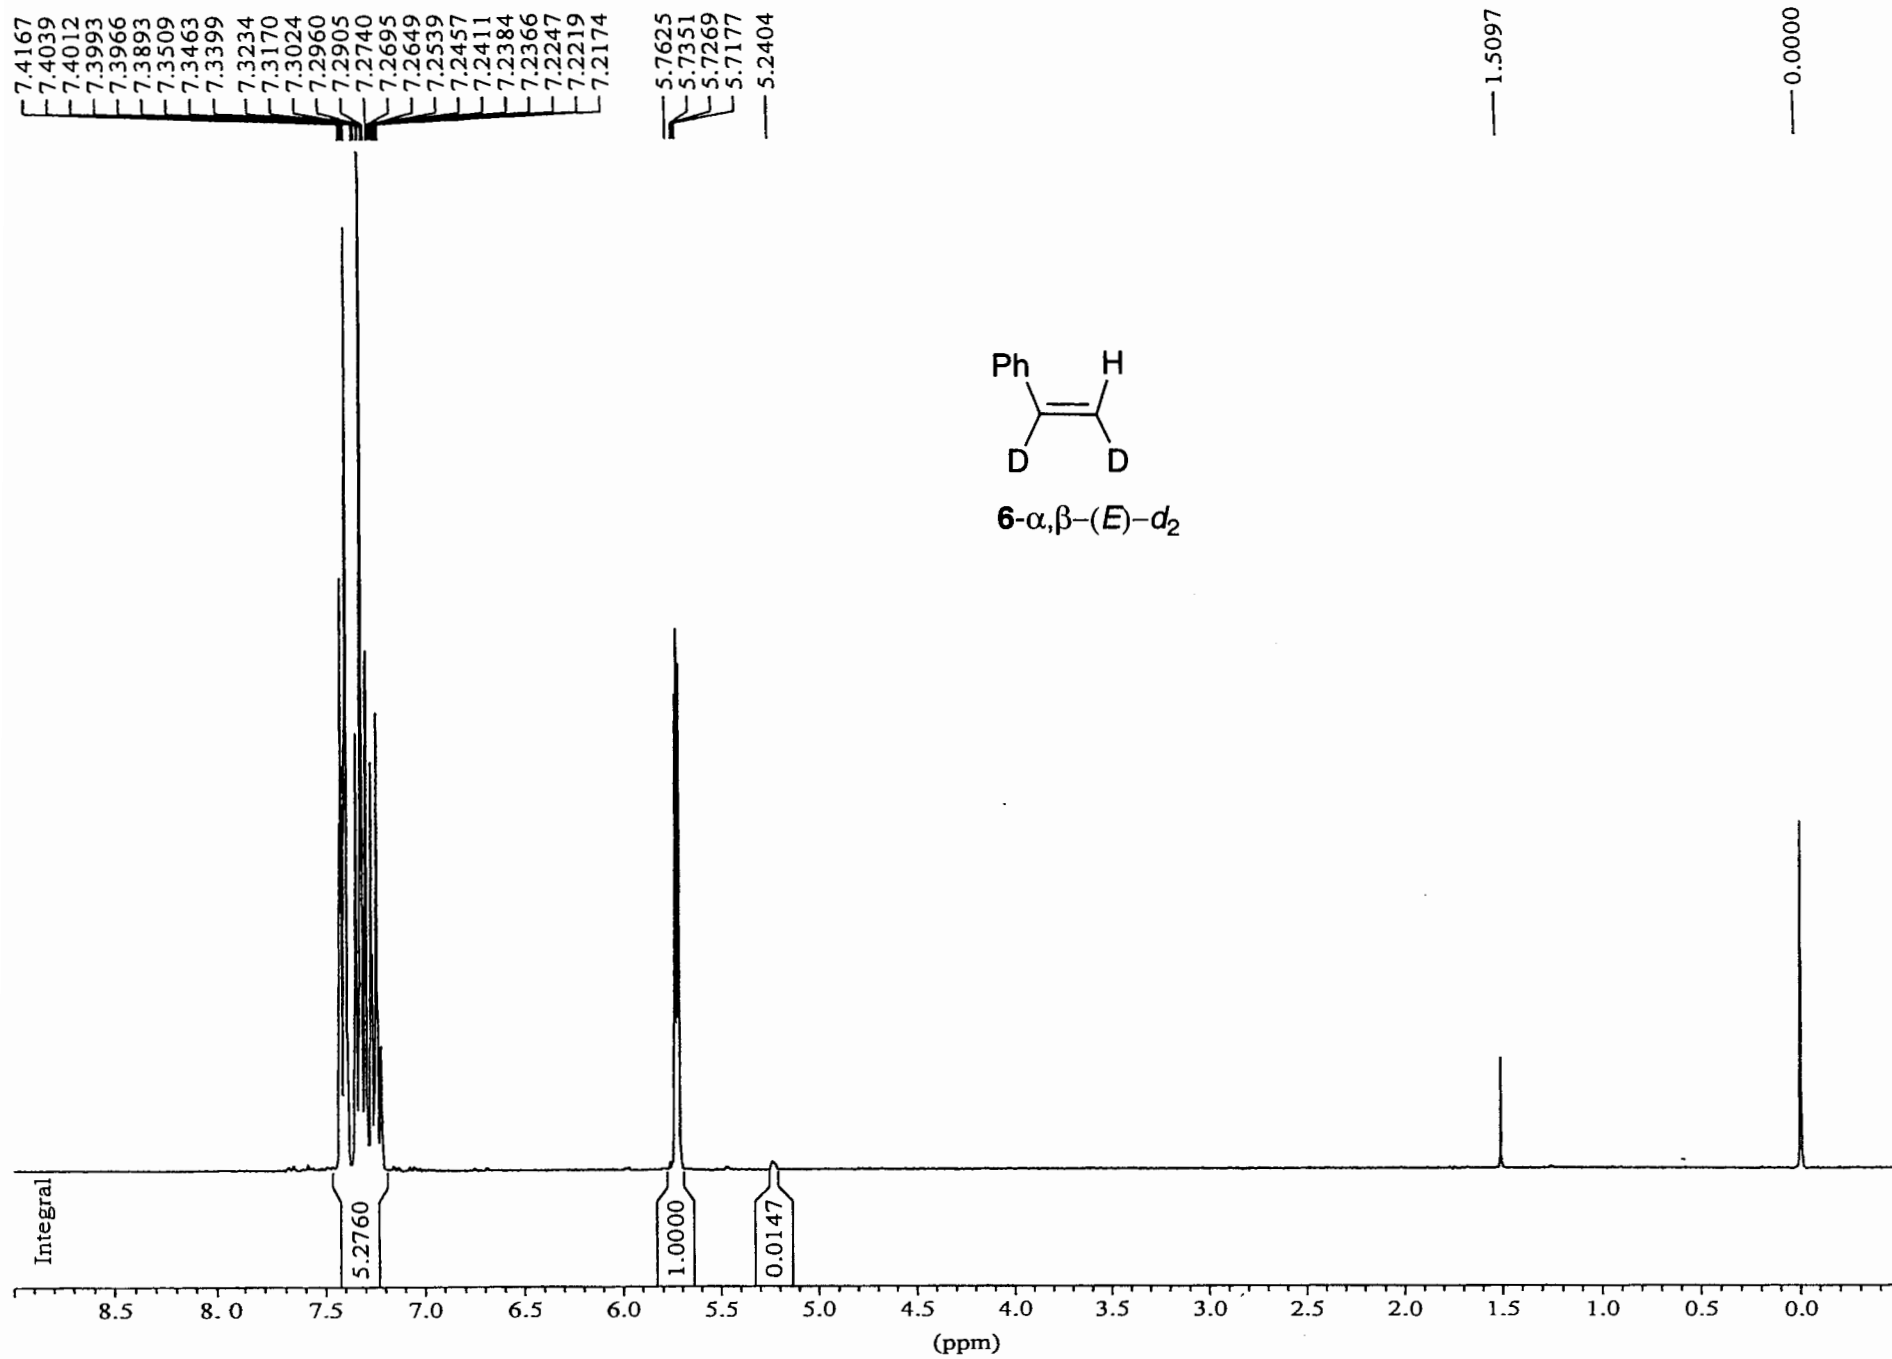

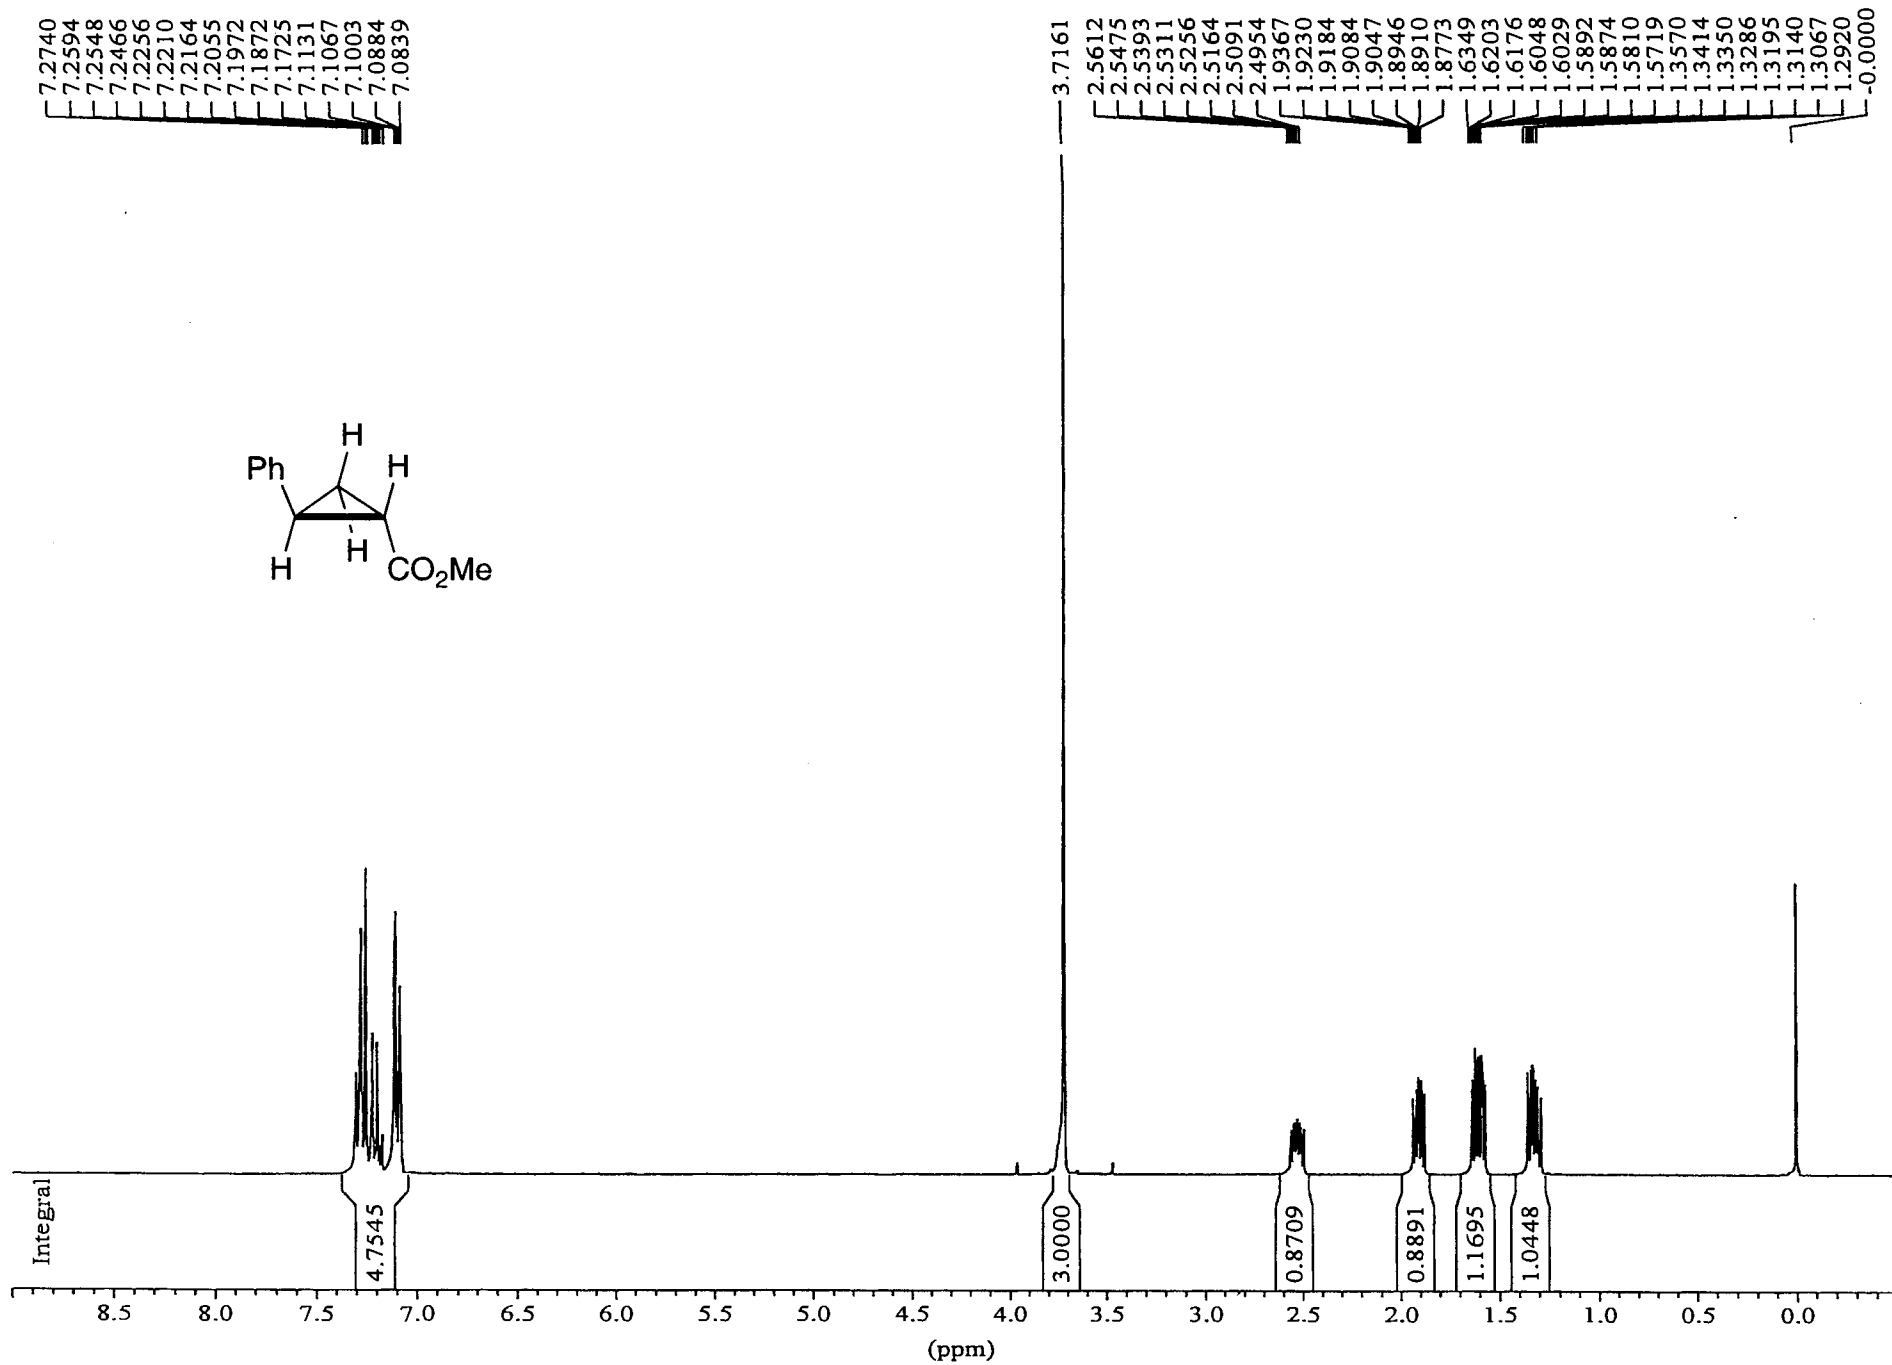

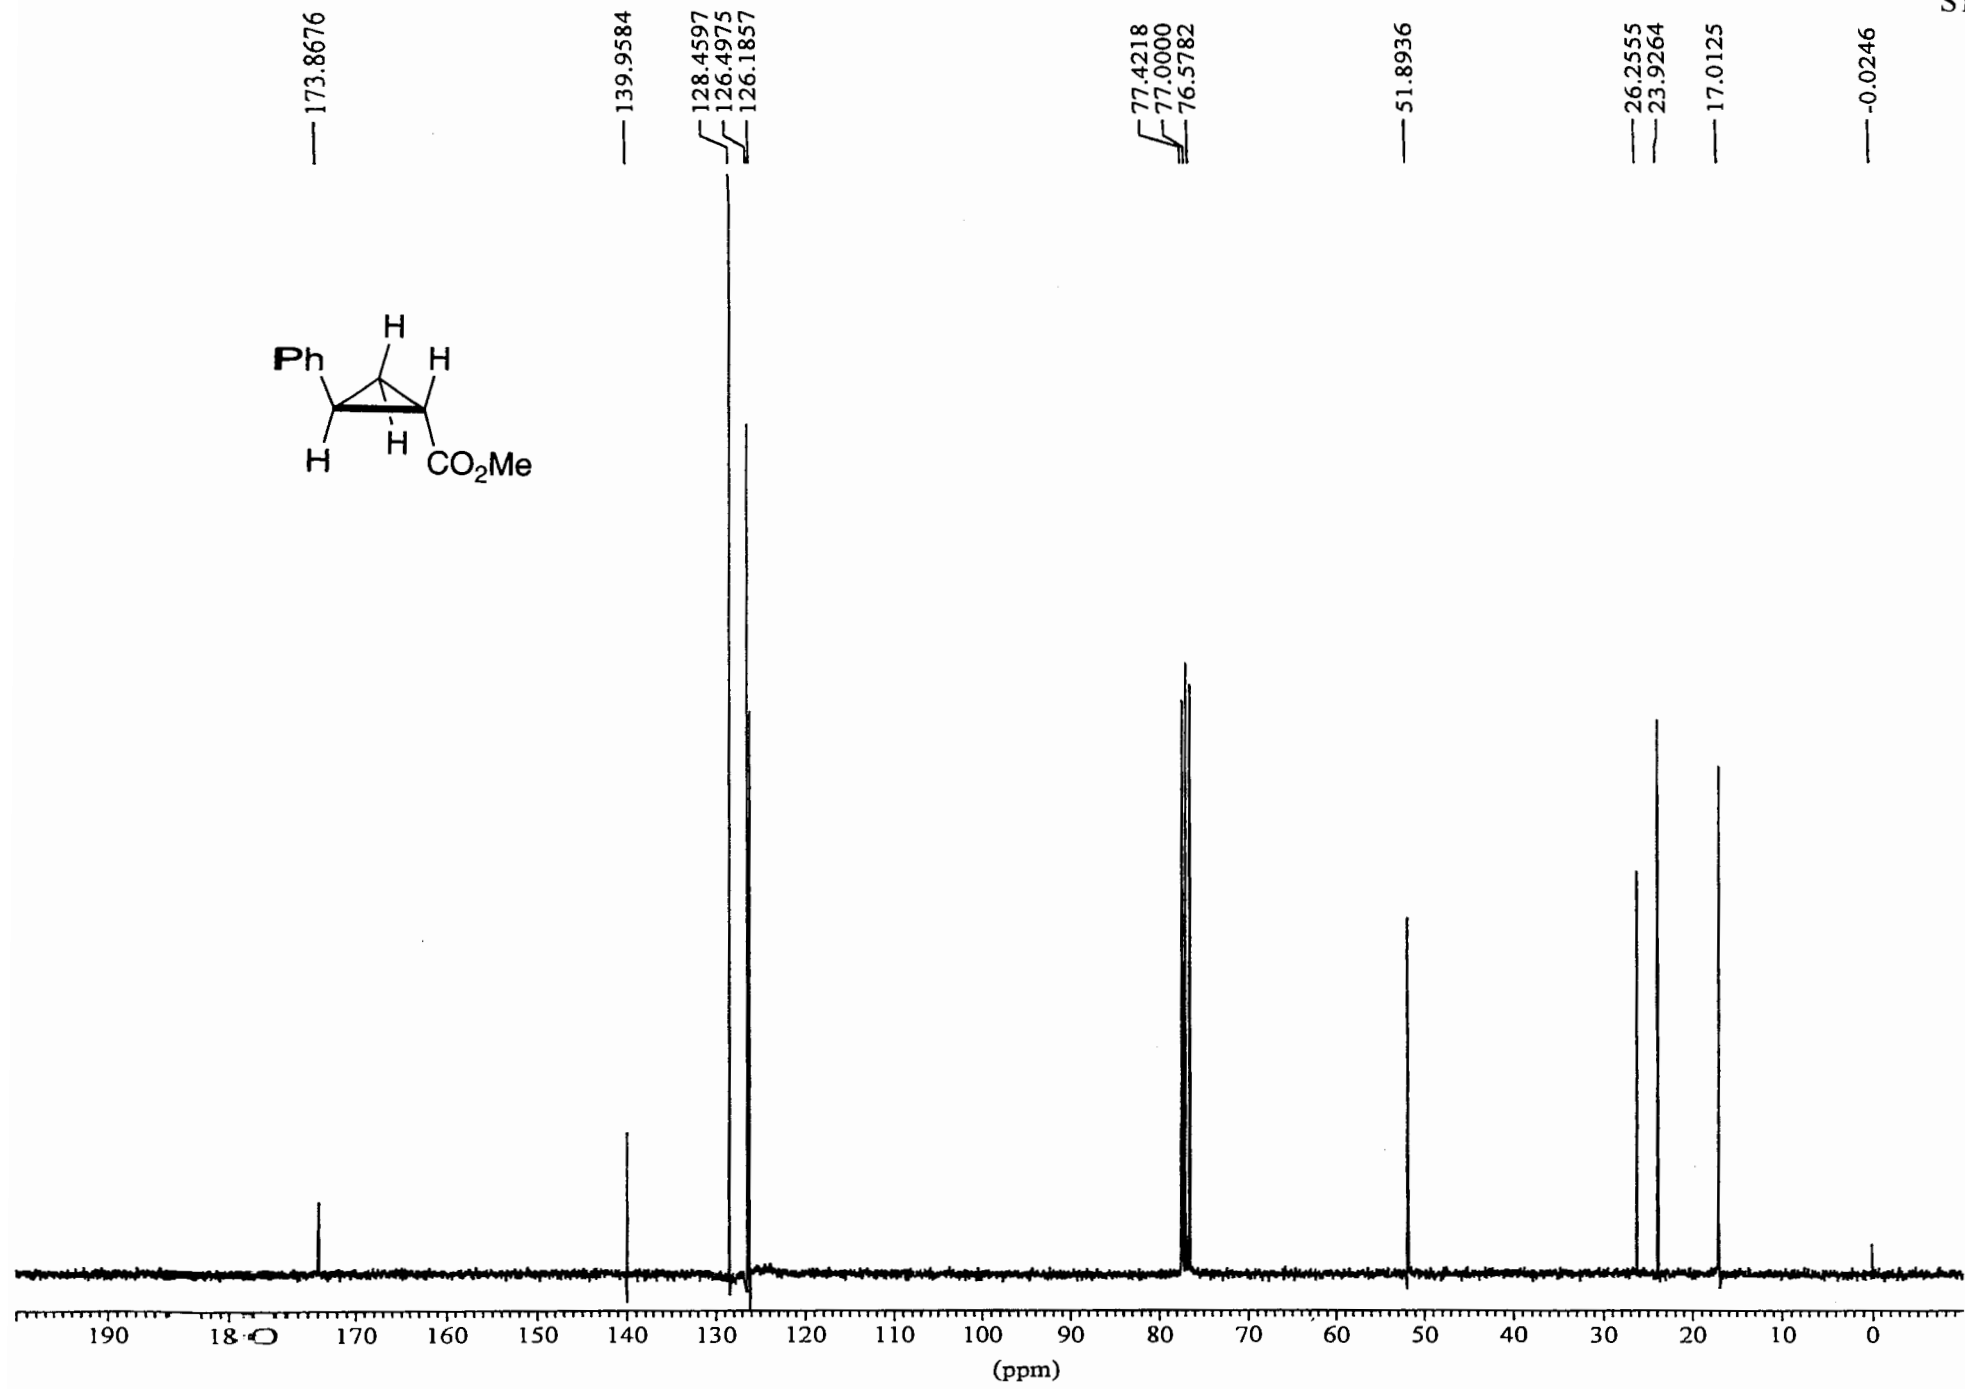



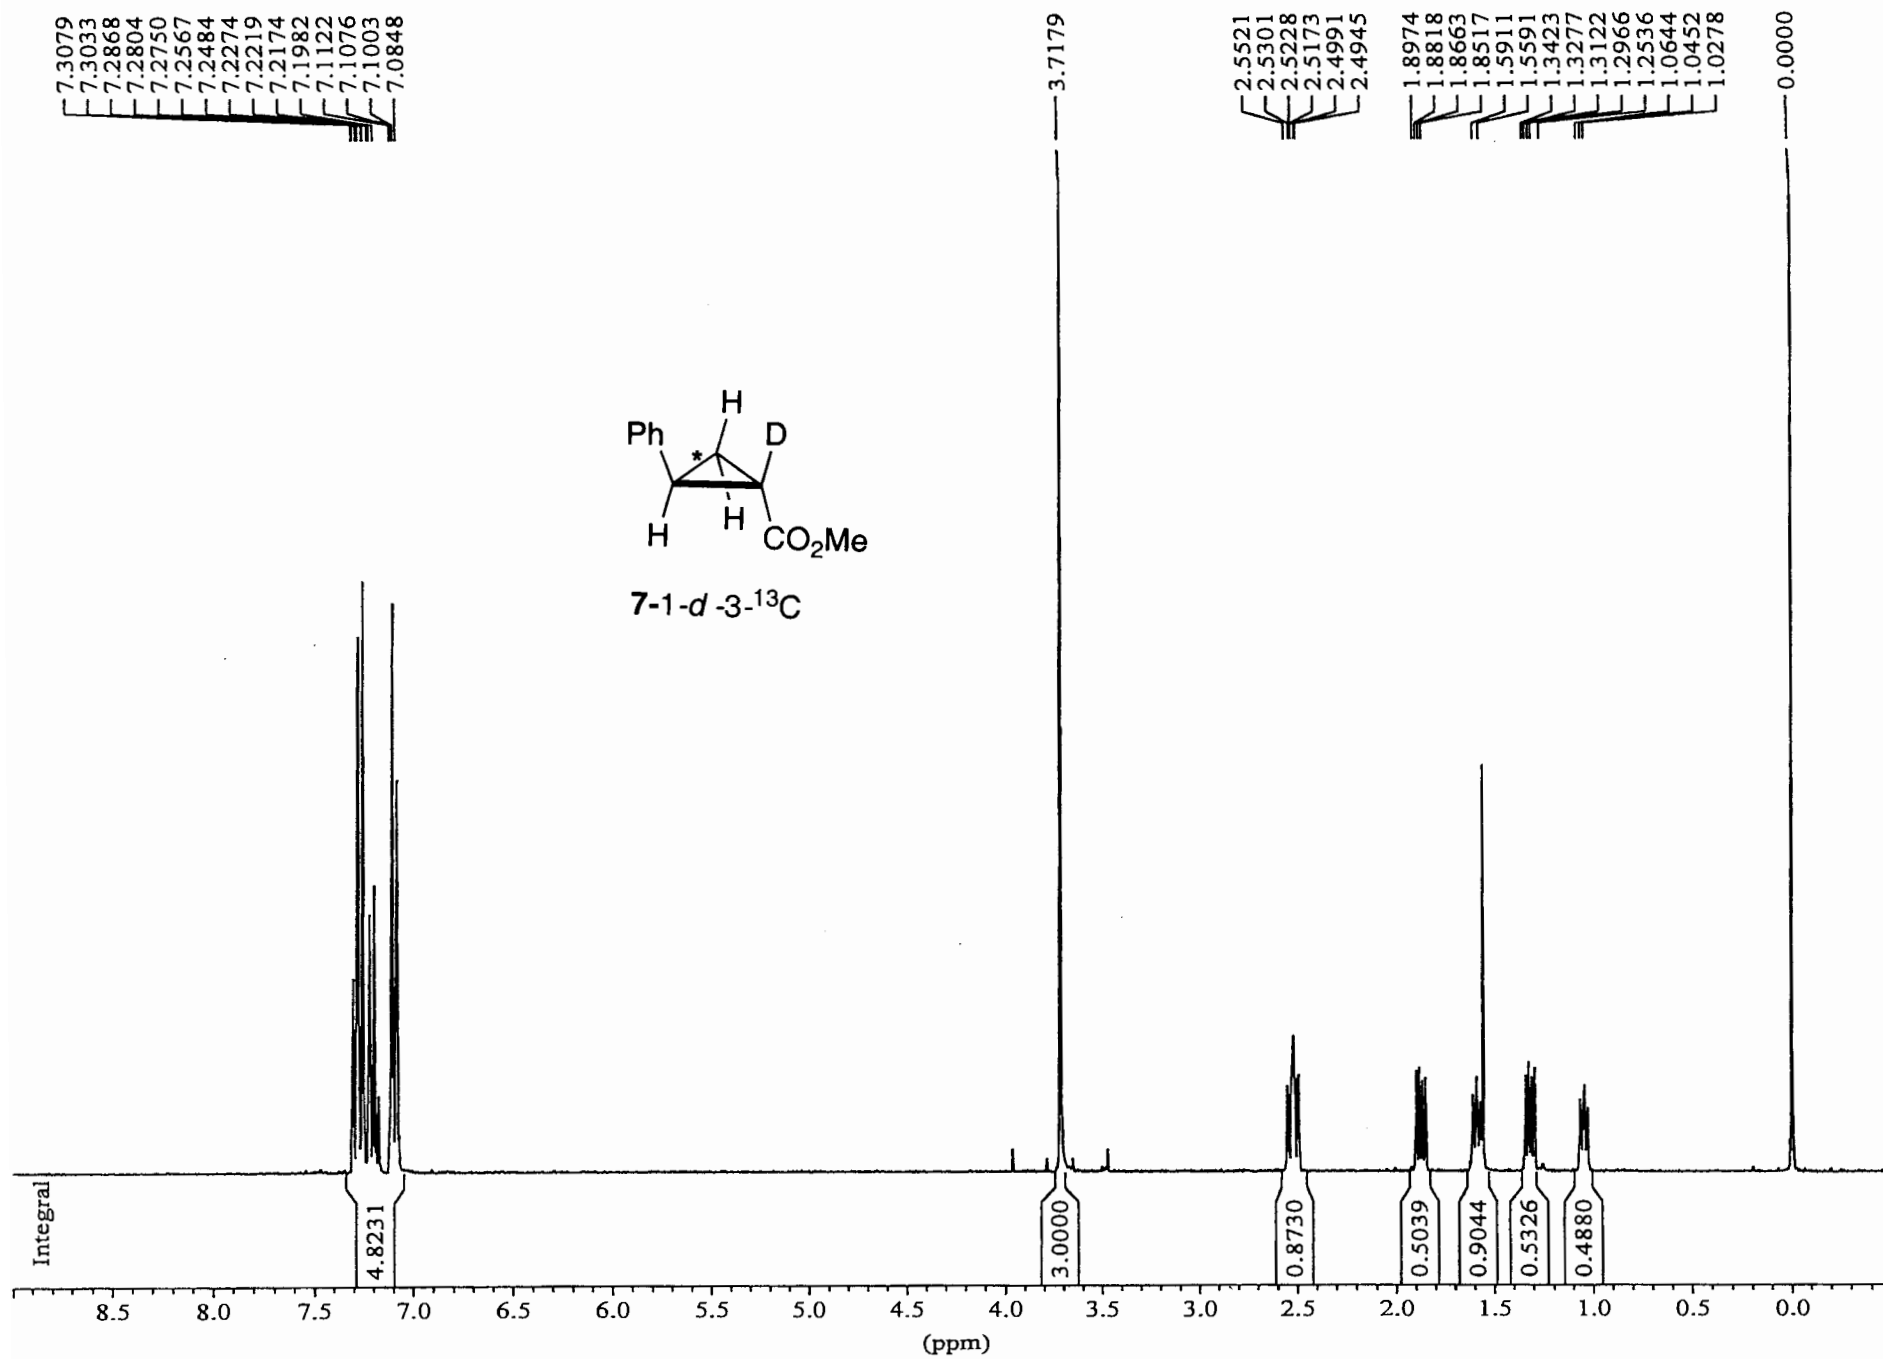

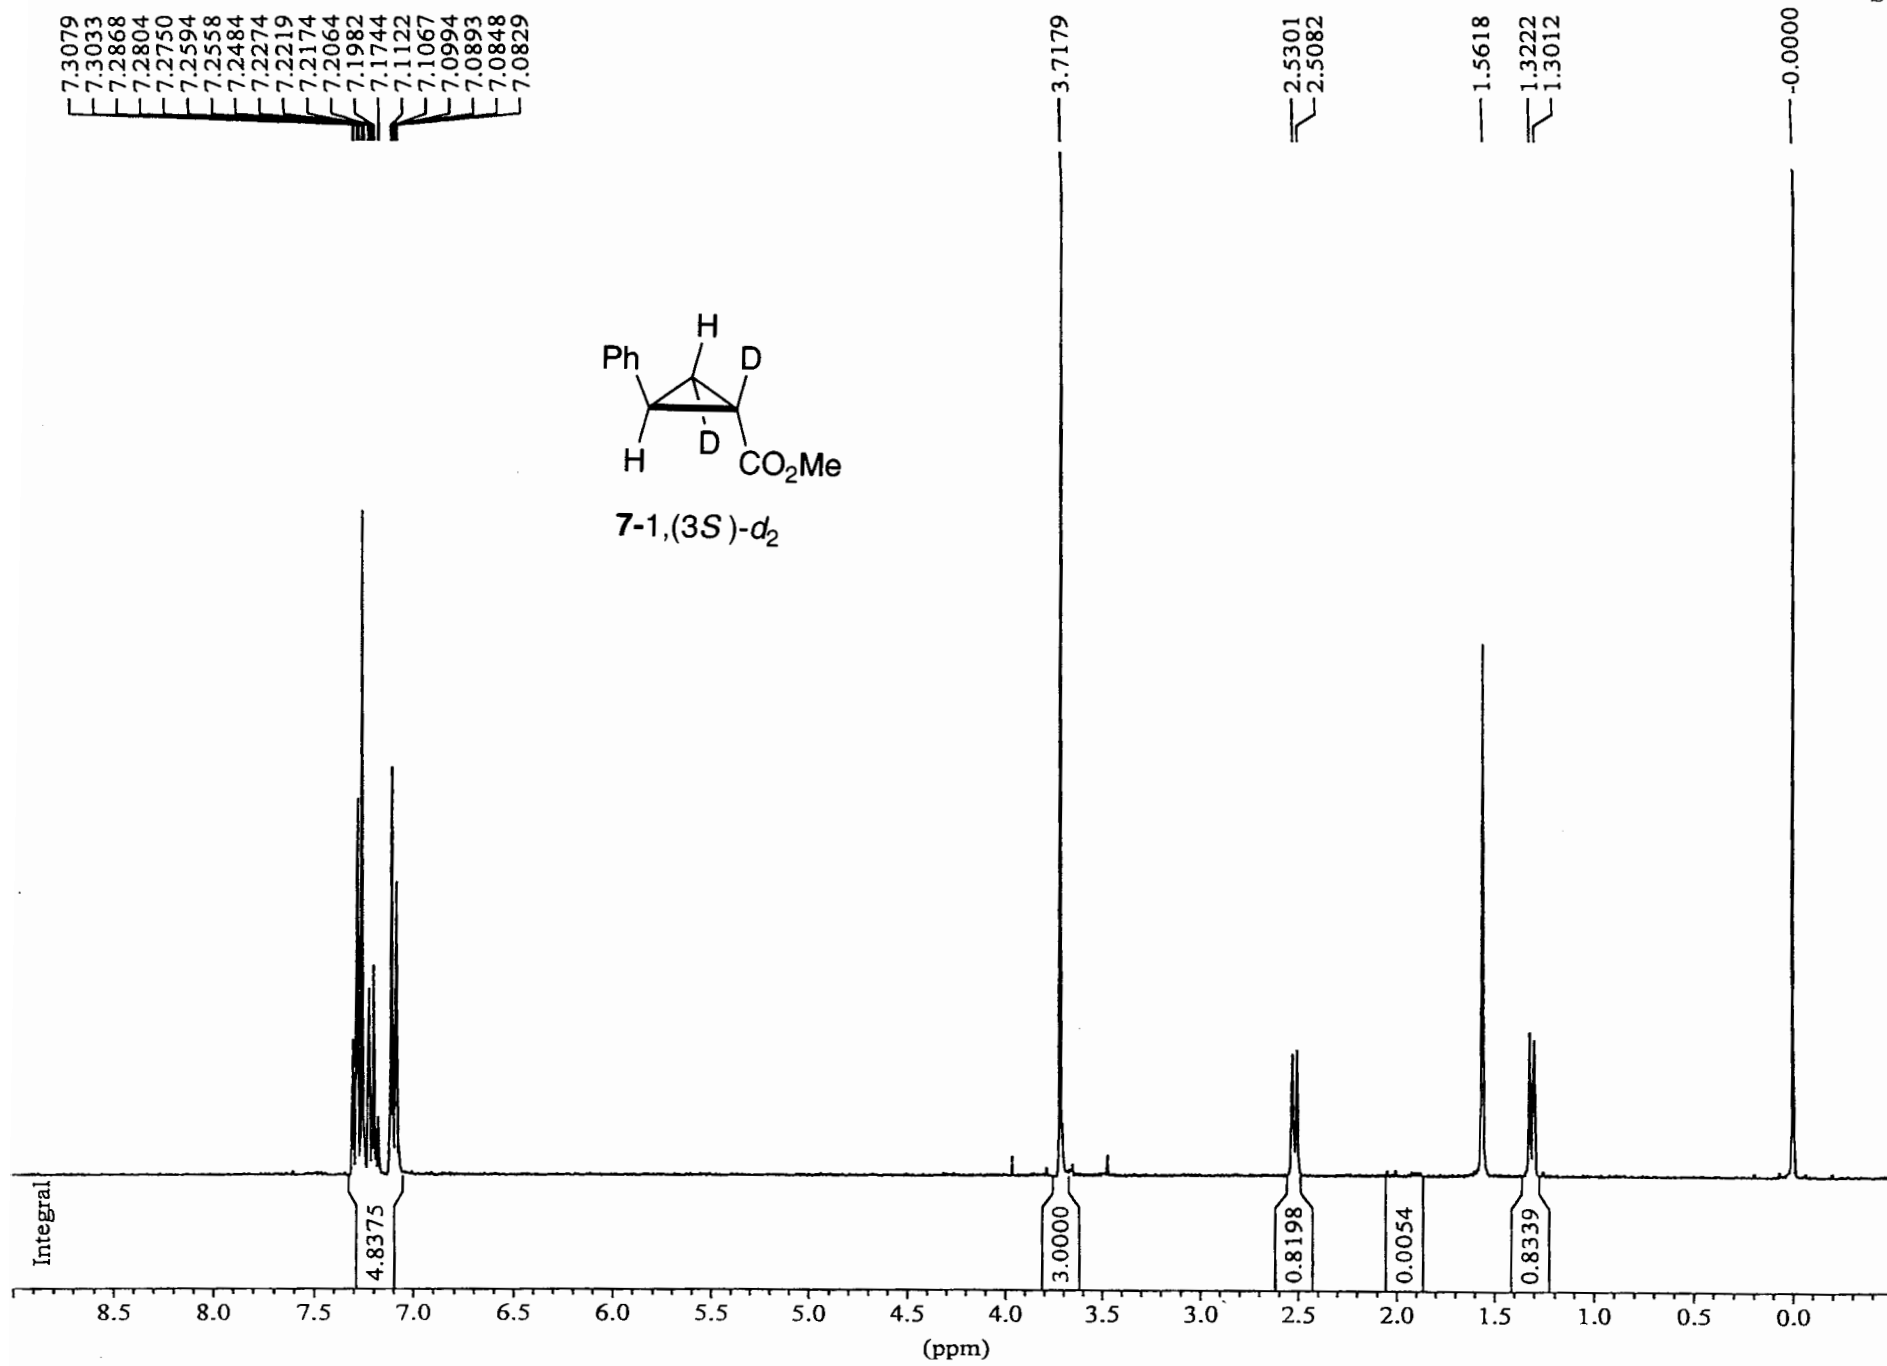

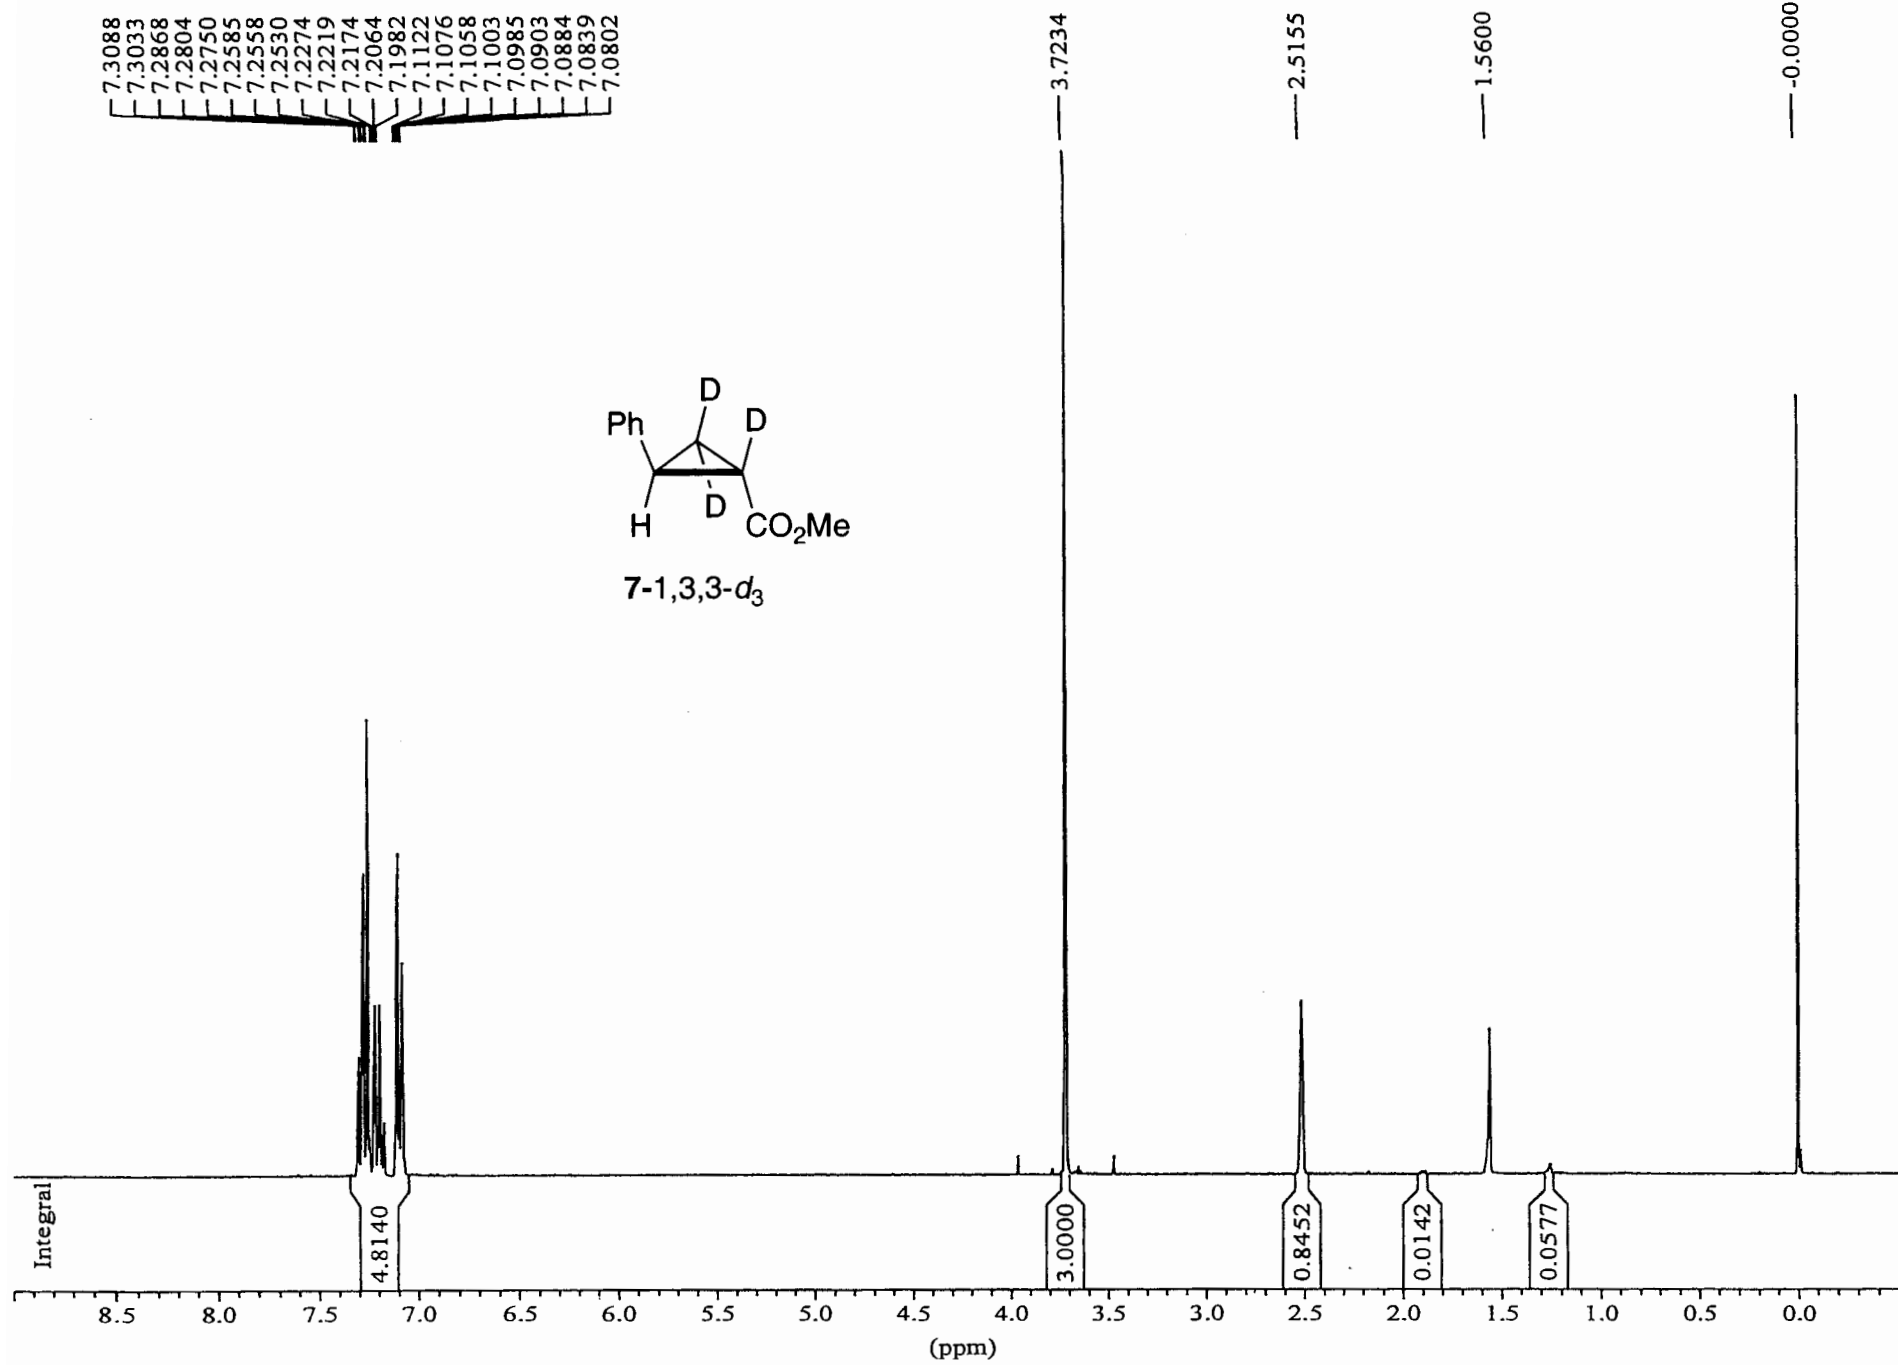

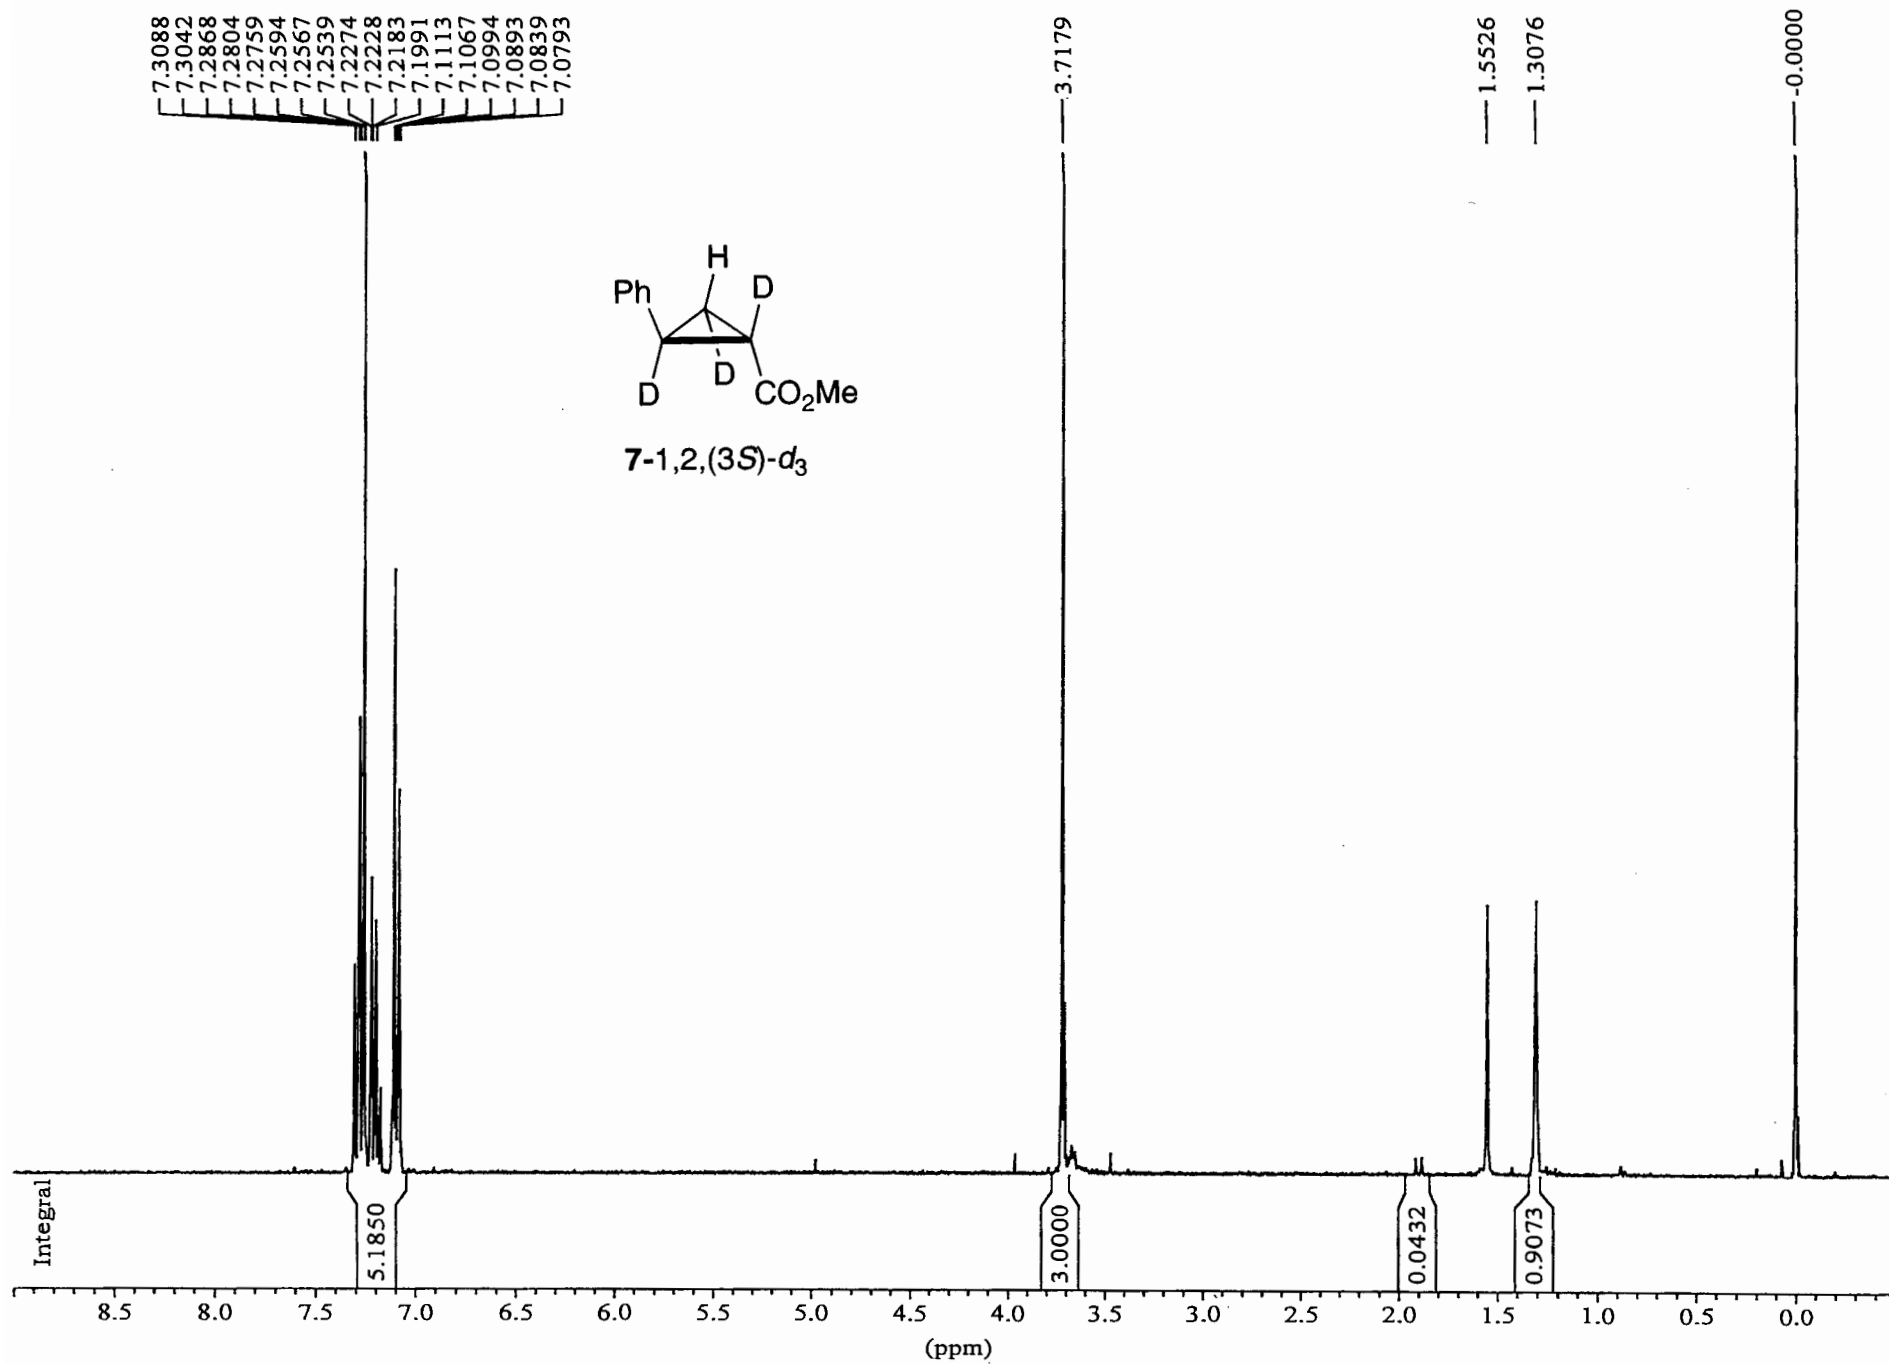

Supplement: b605912k.pdf [file b605912k.pdf]
